# Supplementary material for: MicroRNA Signatures in Blood or Bone Marrow Distinguish Subtypes of Pediatric Acute Lymphoblastic Leukemia
Source: PubMed Central journal article supplement — Transl Oncol. 2020 Jun 9;13(9):100800. doi: 10.1016/j.tranon.2020.100800 (PMC7292917; doi:10.1016/j.tranon.2020.100800), 2020-06-09
Supplement: mmc1.pdf [file mmc1.pdf]

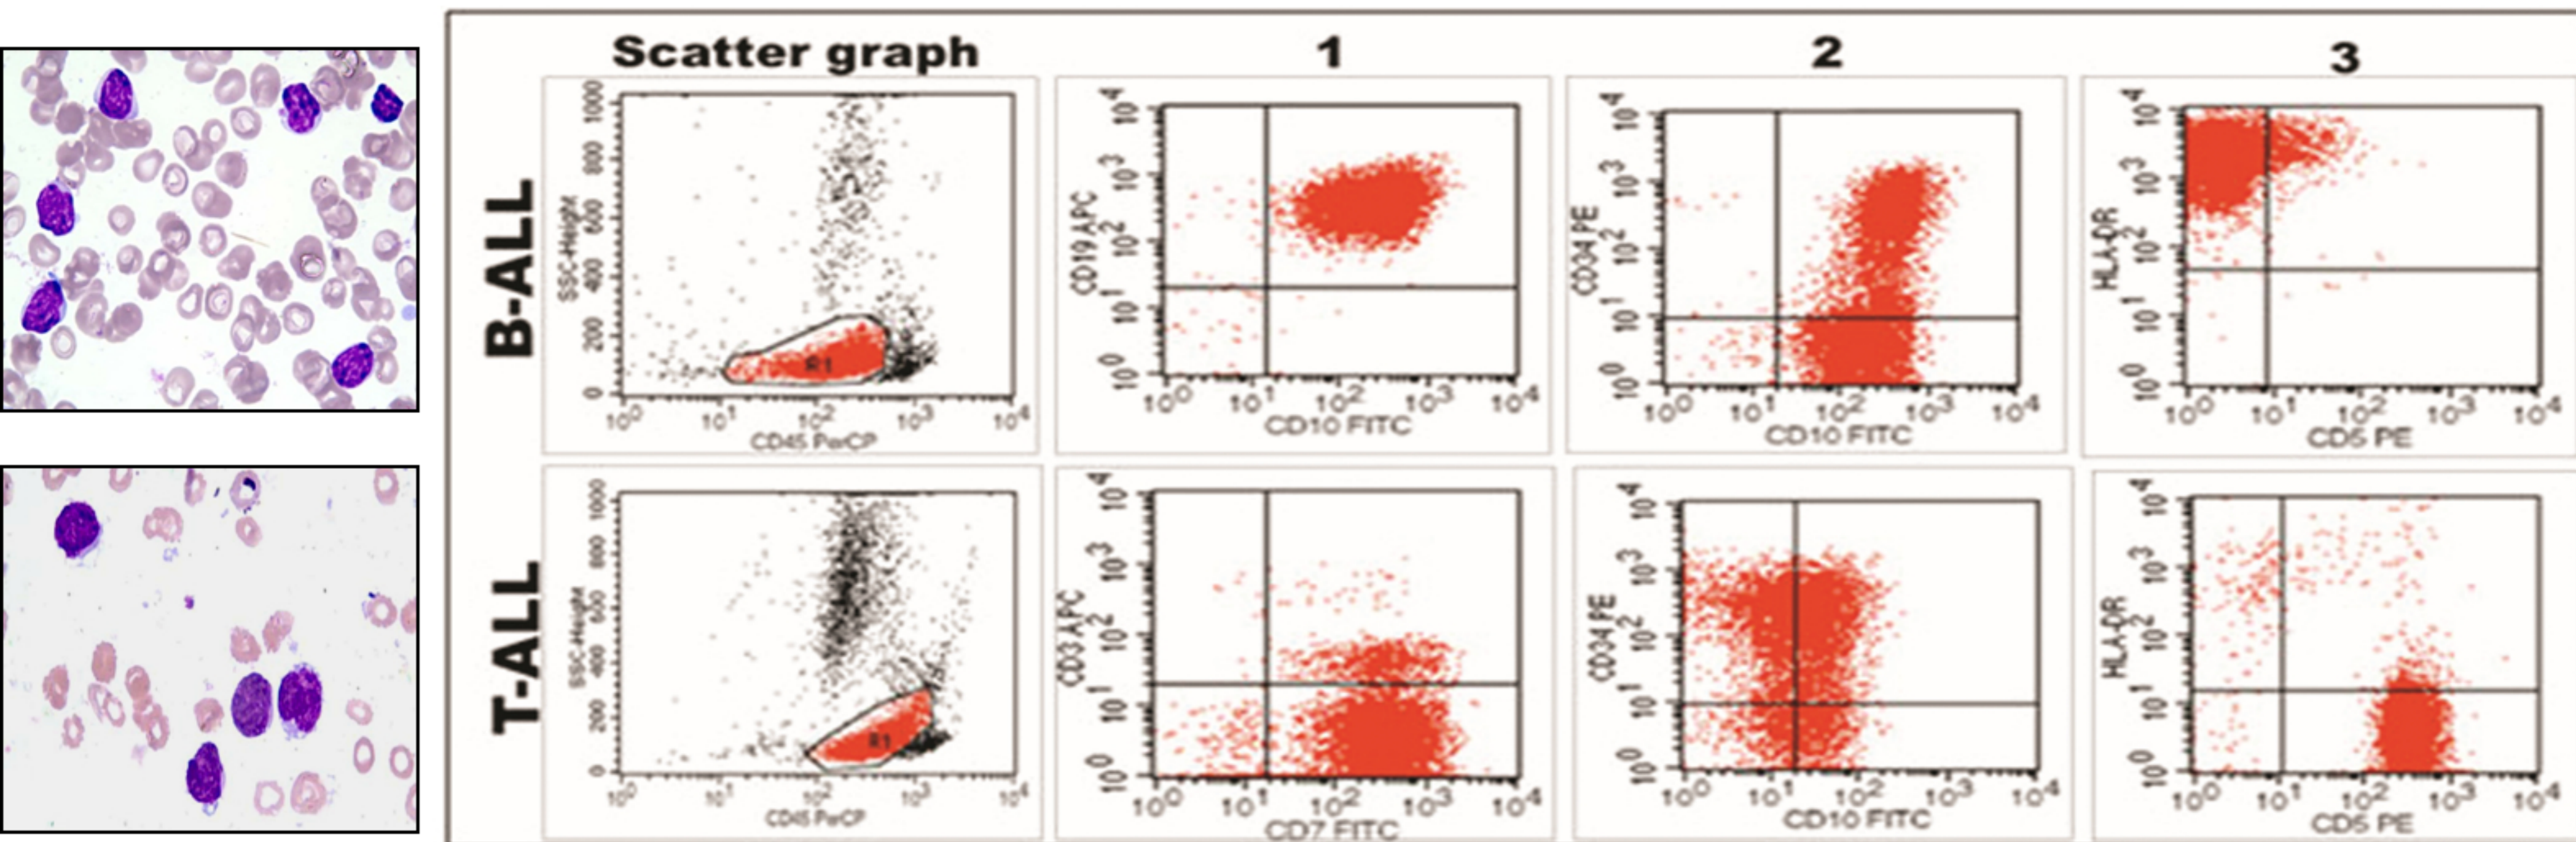

**Supplementary Figure 1: Flow cytometric analysis of T-ALL and B-ALL** (A) Flow cytometry of leukemic samples by CD45 gating shows B-ALL expressing CD 19, CD10, CD34 and HLA-DR. (B) shows T-ALL expressing CD7, CD5 CD10 and CD34. The panel of directly conjugated antibodies with different fluorochromes comprised of CD13 (PE- L138), CD14 (APC- MOP9), CD33 (FITC-P67.6), CD117 (APC104D2), MPO (FITC-5B8), CD10 (FITCHI10a), CD2 (PE-S5.2), CD3 (APC-SK7), CD3 (FITC-UCHT1), CD4 (PESK3), CD5 (PEL17F12), CD7 (FITC-4H9), CD23 (APC-EBVCS-5), CD8 (FITC-SKI), CD19 (PERCPr-4G7), CD25 (APC-2A3), CD20 (APC-L27), CD34 (PE-8G12), CD61 (FITC-RUU-PL7F12), CD22 (PE-S-HCL-1), CD38 (FITCHB7), CD64 (F-10.1), CD19 (APC-SJ25C1), CD45 (PERCP-2D1), CD79a (PE-2ST8.5H7), HLA-DR (APC-L243).

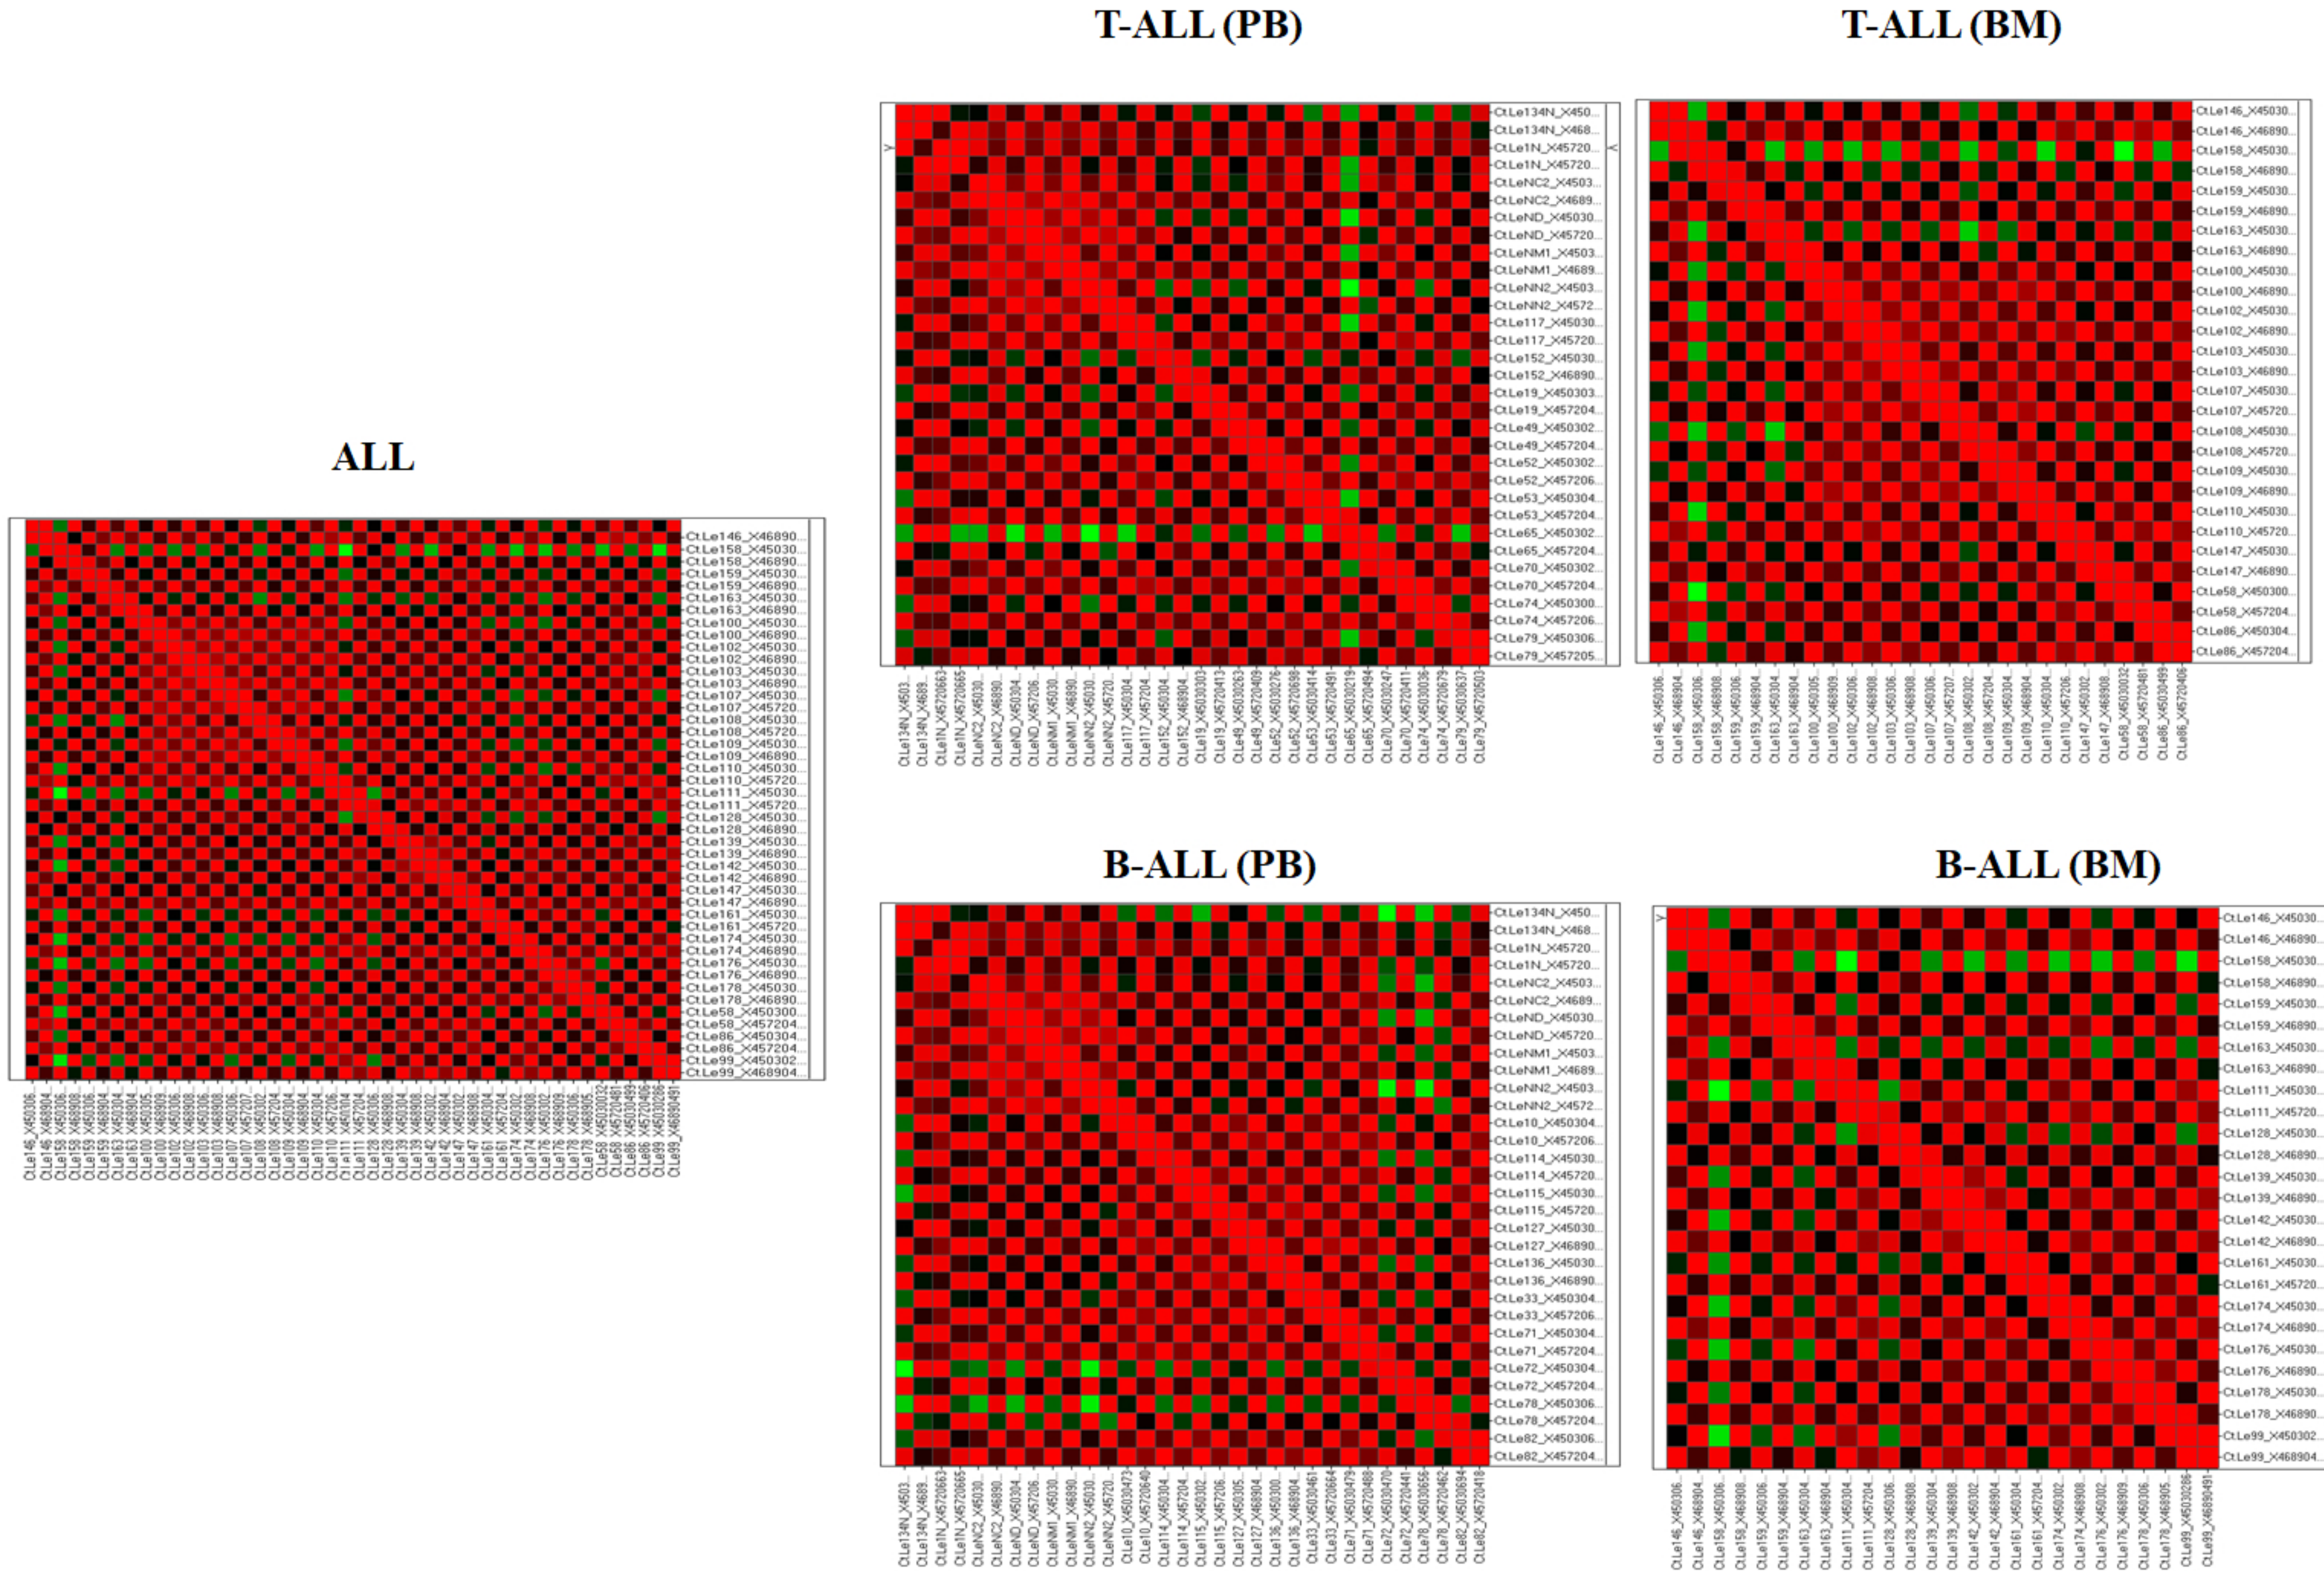

**Supplementary Figure 2: Heat map of microRNA expression profiles in A-LL.** TLDA heatmap depicting gene expression profiles of microRNAs. Green colour in the heatmap depicts downregulated microRNAs and red colour represents up-regulated microRNAs.

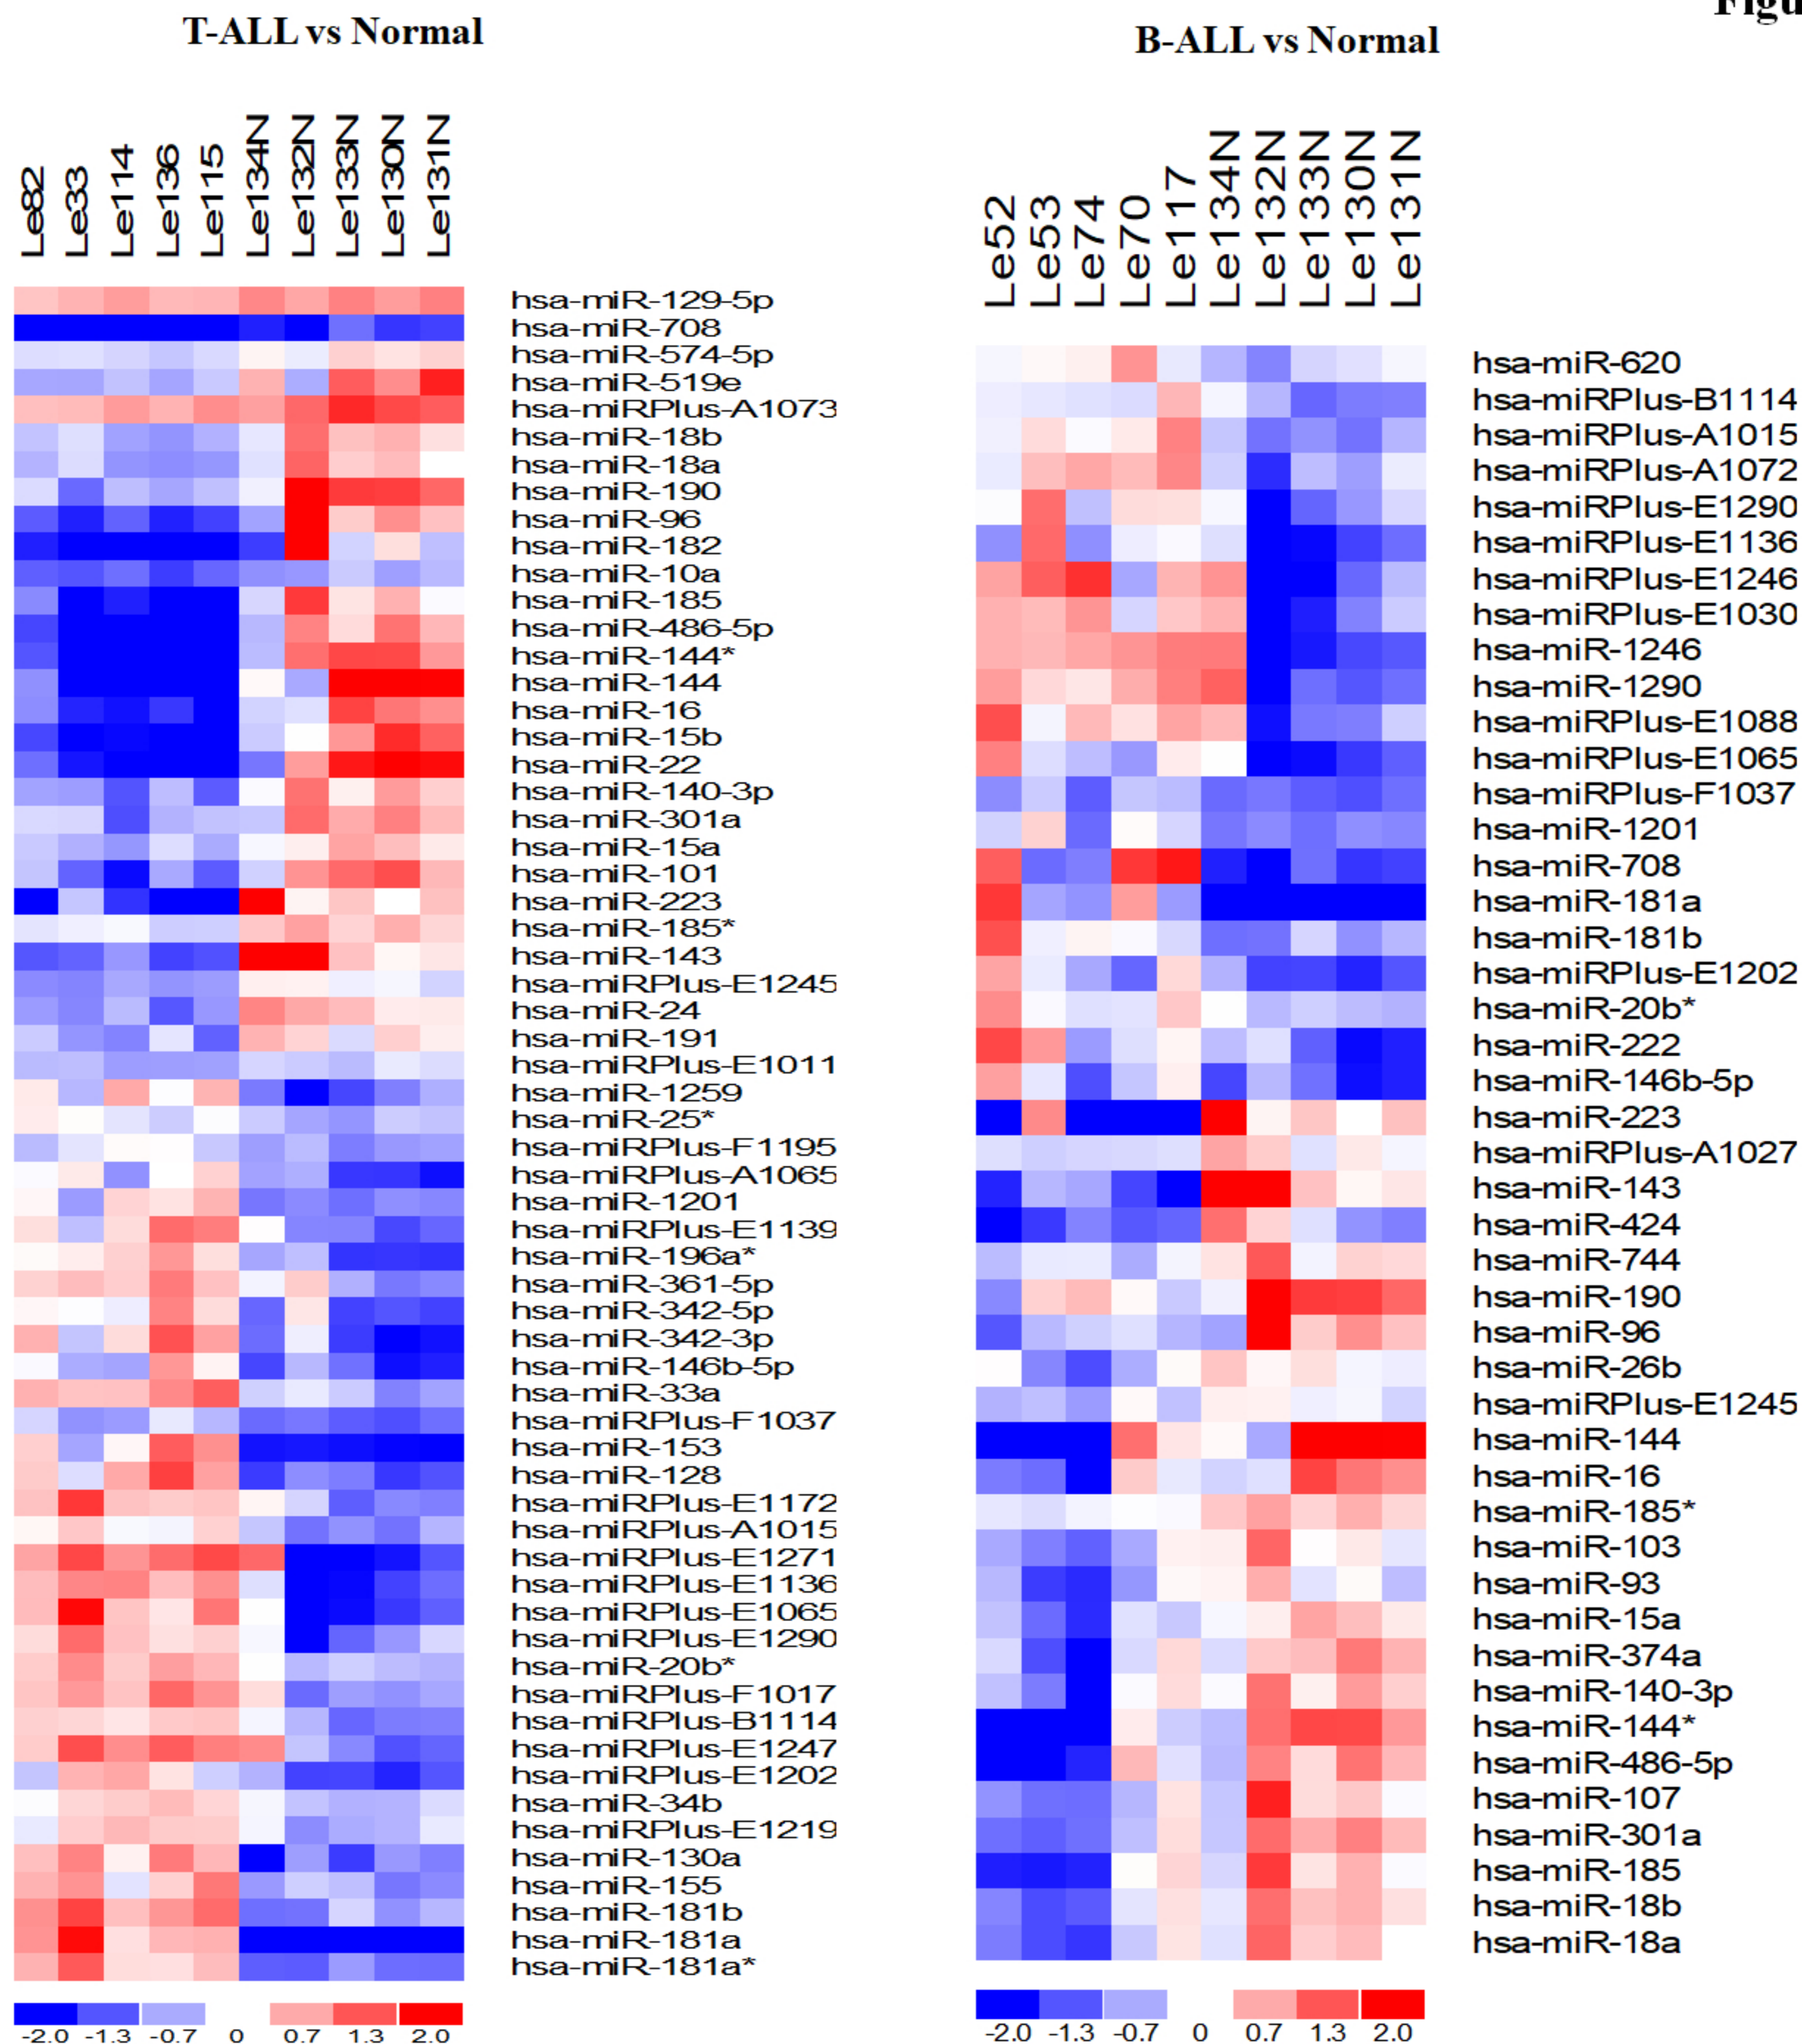

**Supplementary Figure 3: Map of microRNA expression profiles in A-LL.** Heat map depicting unsupervised hierarchical clustering of microRNA expression using LNA arrays.

**Figure S4.**

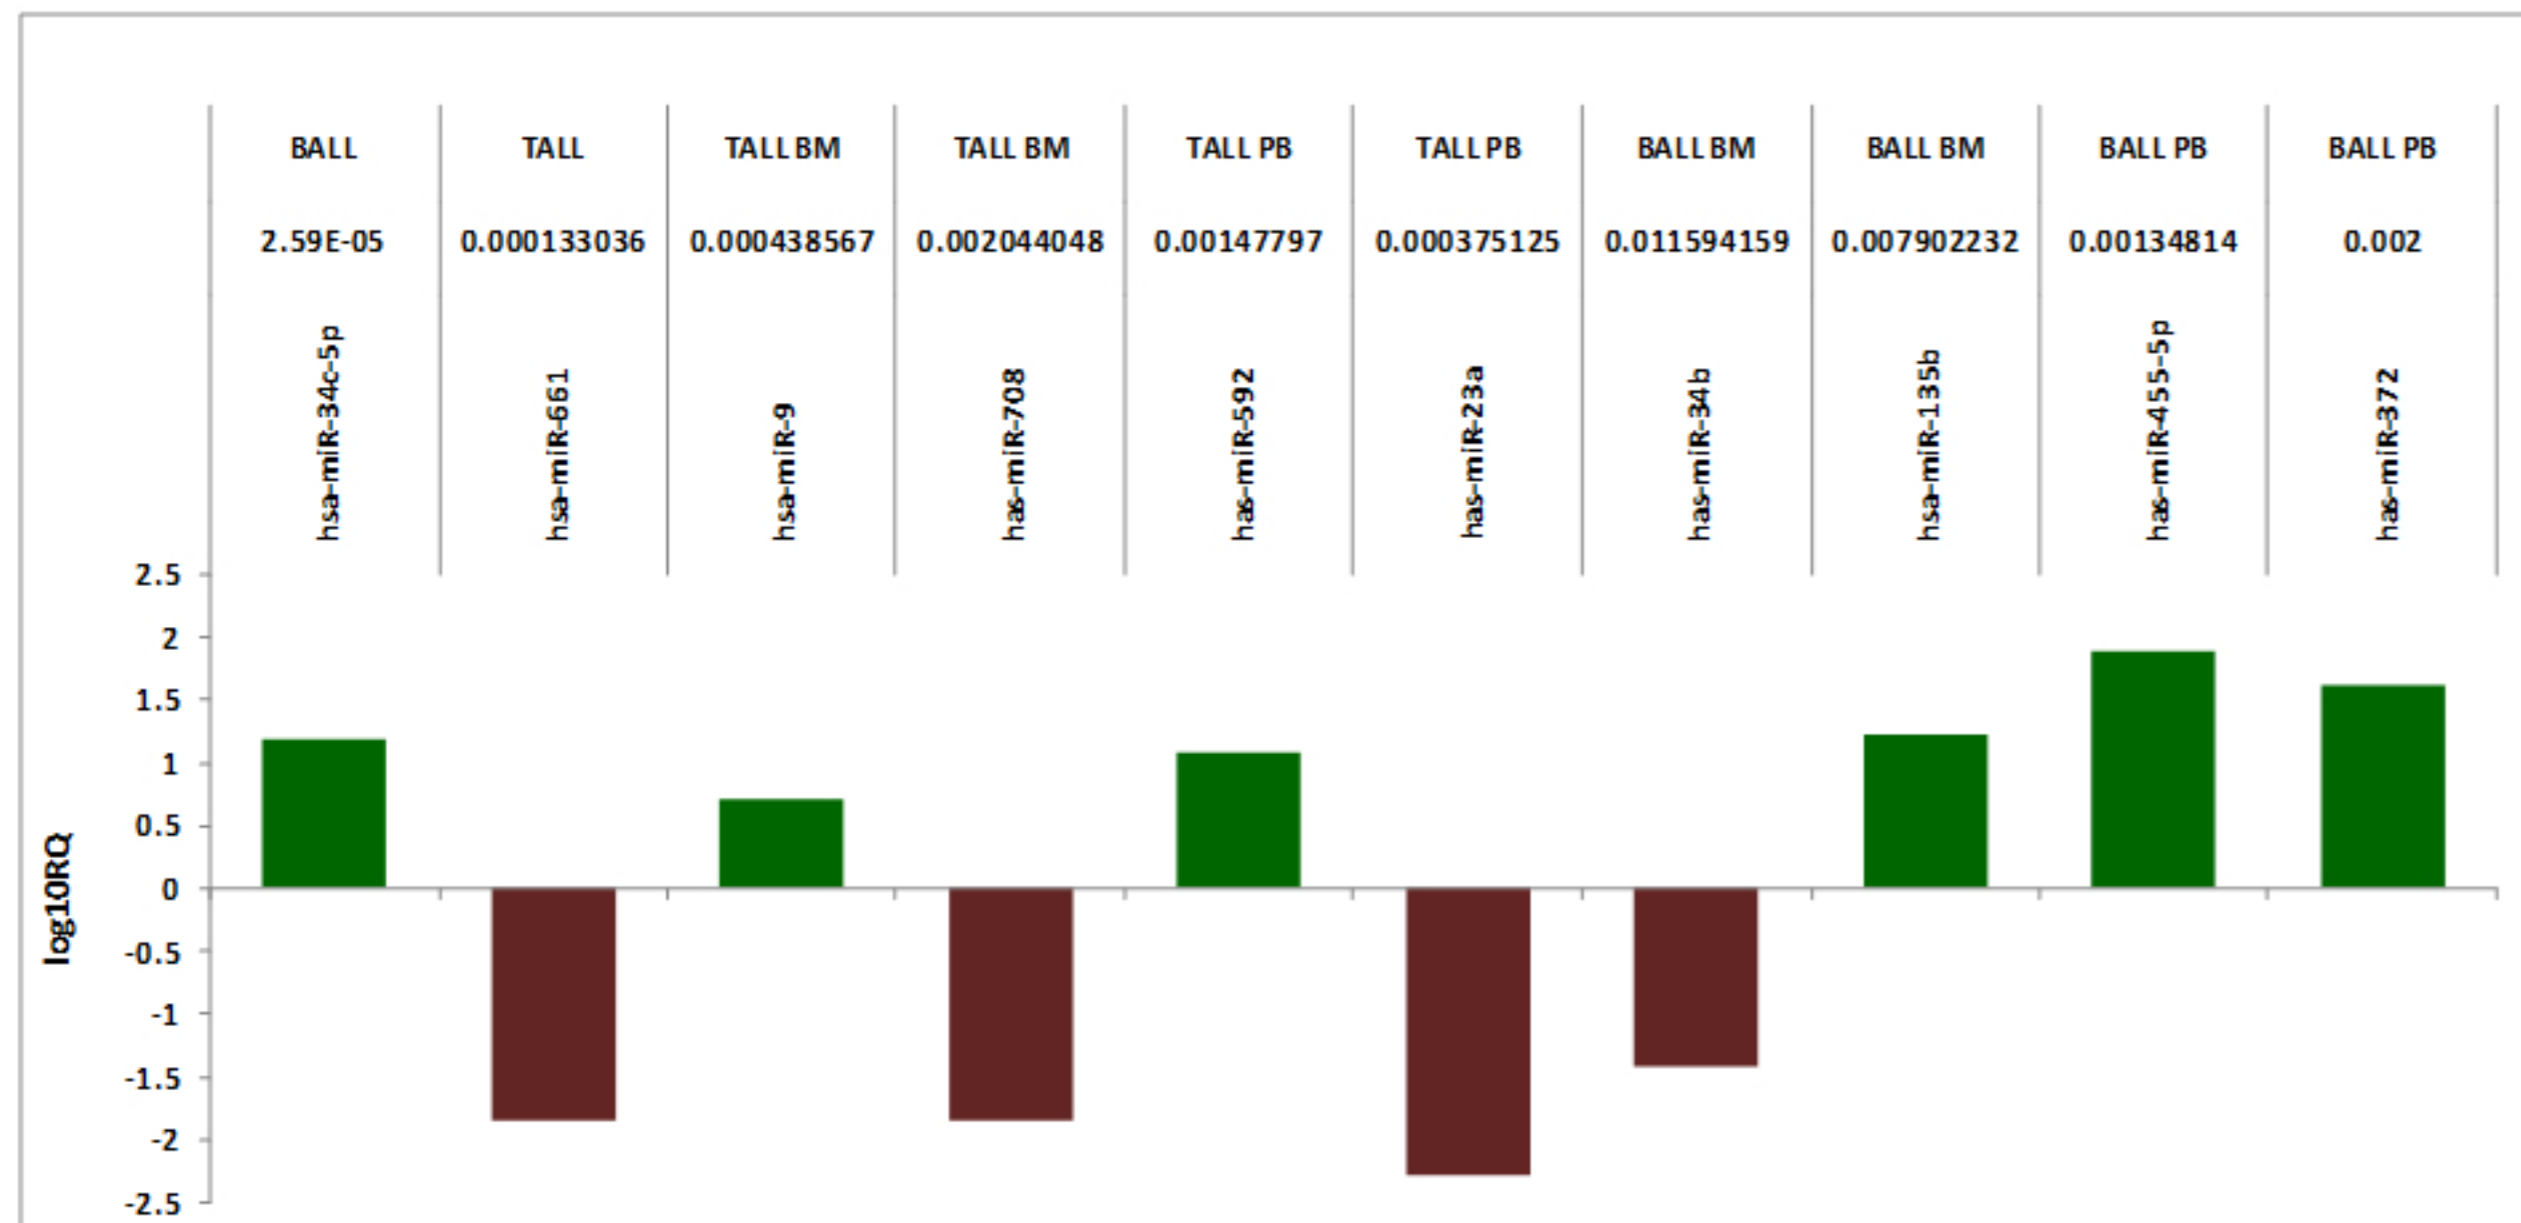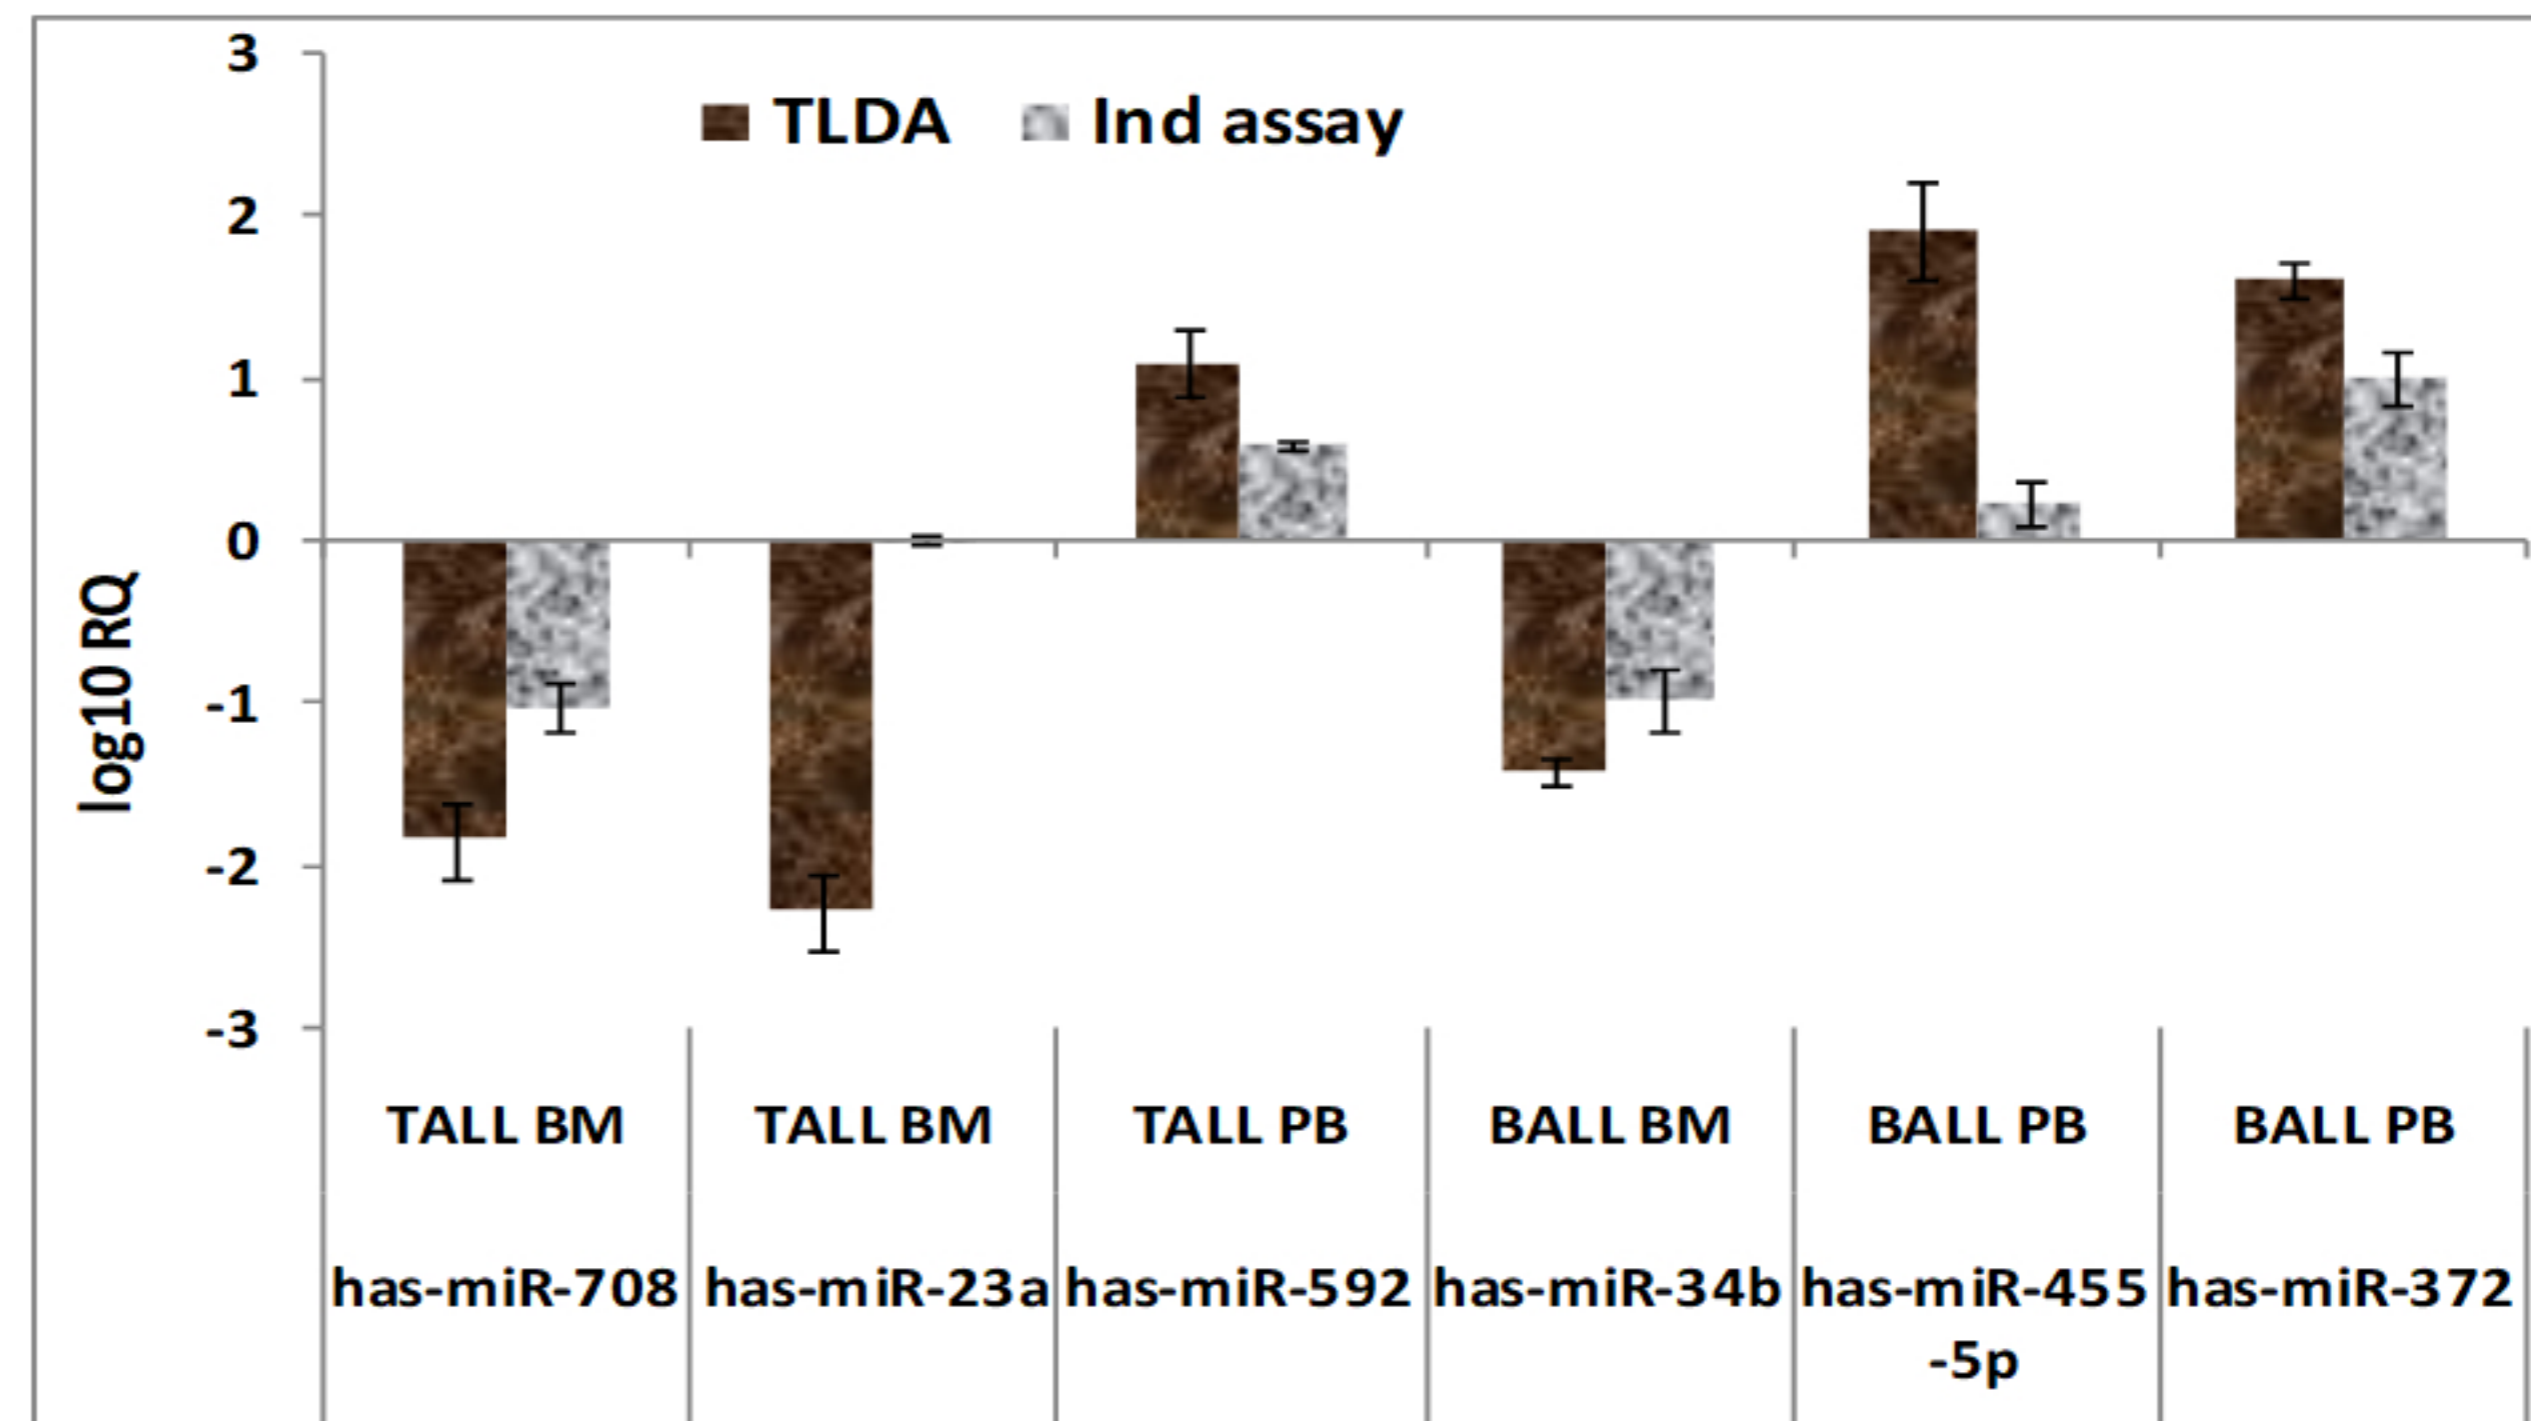

**Supplementary Figure 4: microRNAs selected for individual assay validation.** Common microRNAs that showed significant up/down regulation from TLDA and LNA arrays were subjected to double blind validation assays.

**Figure S5.**

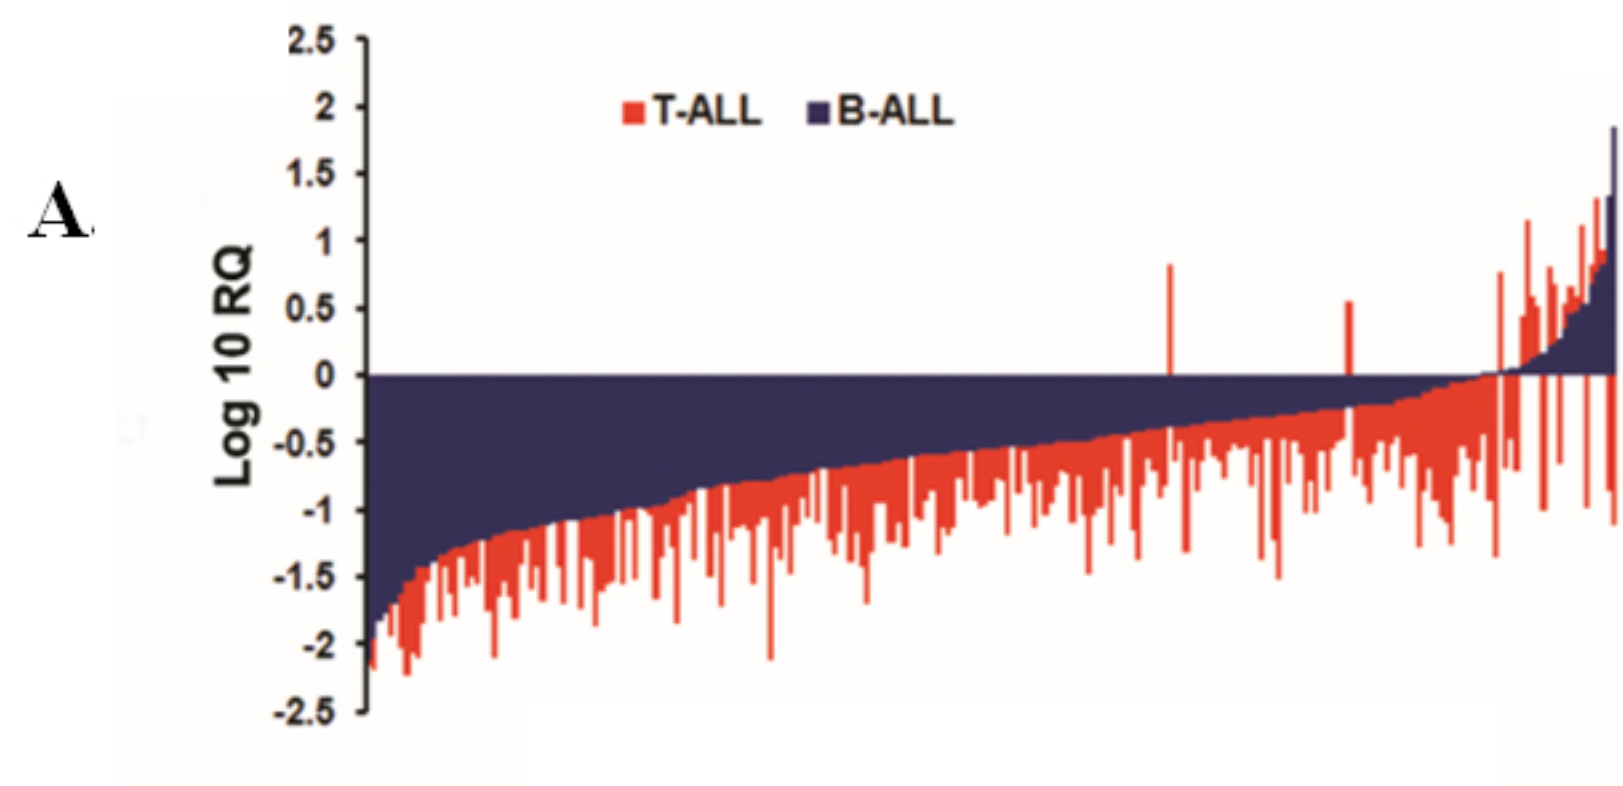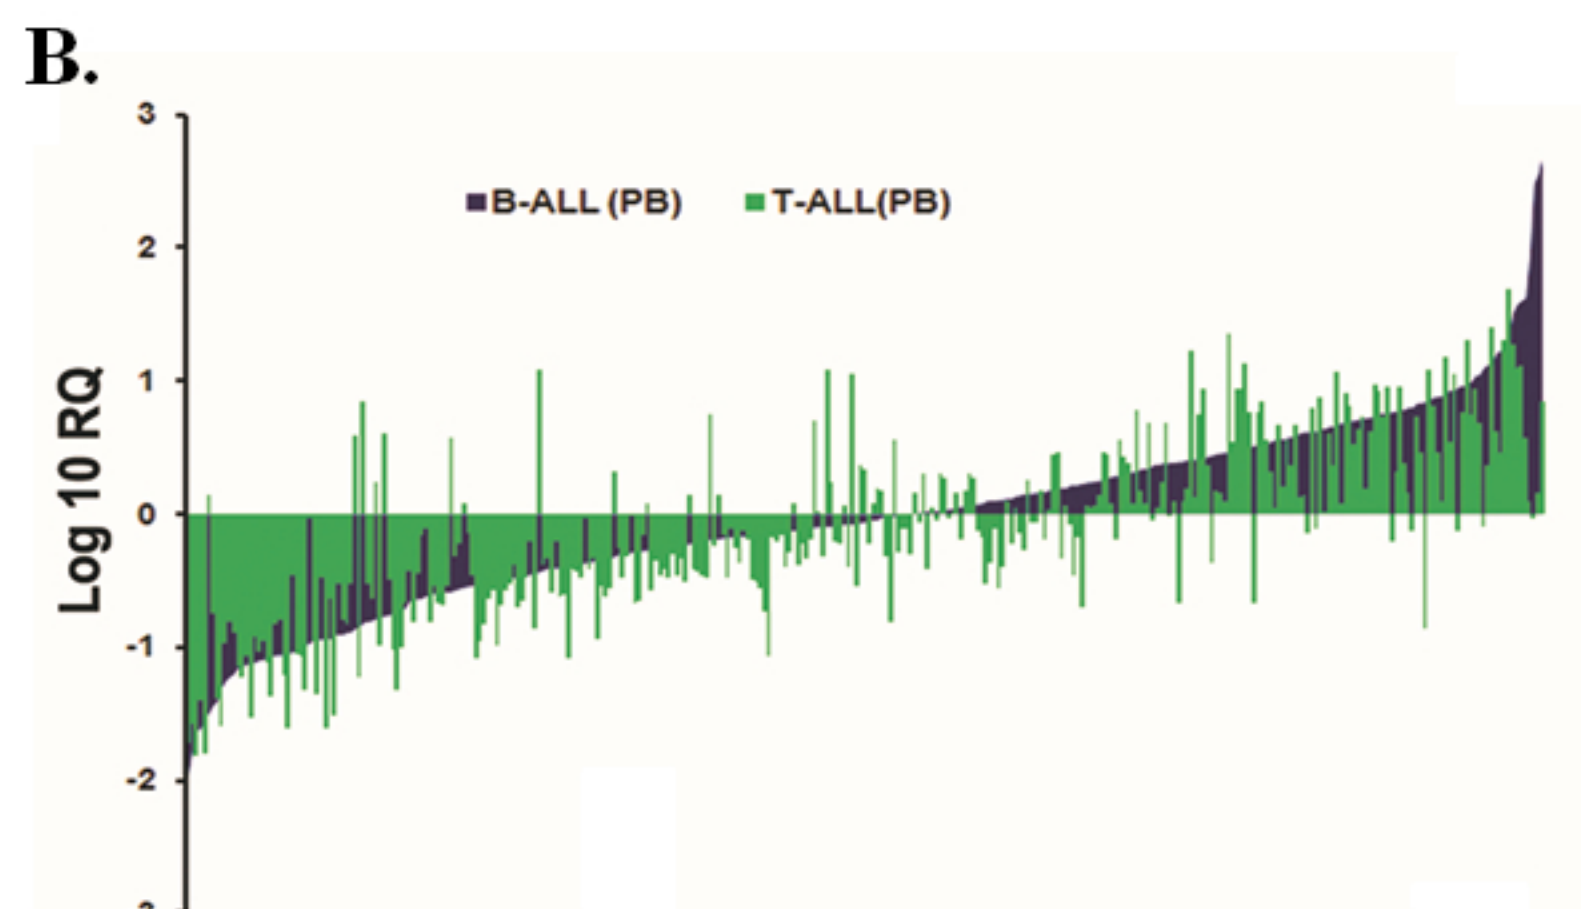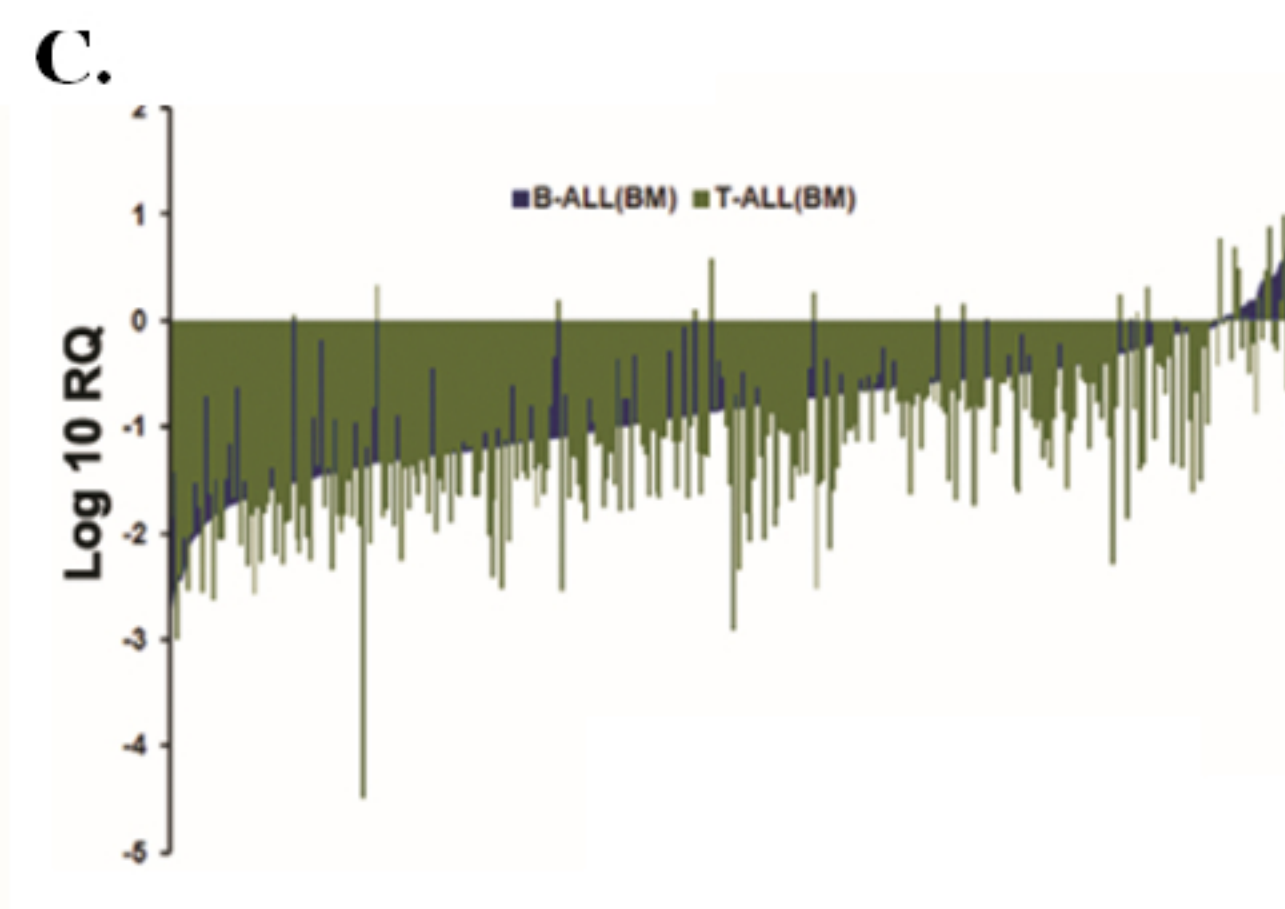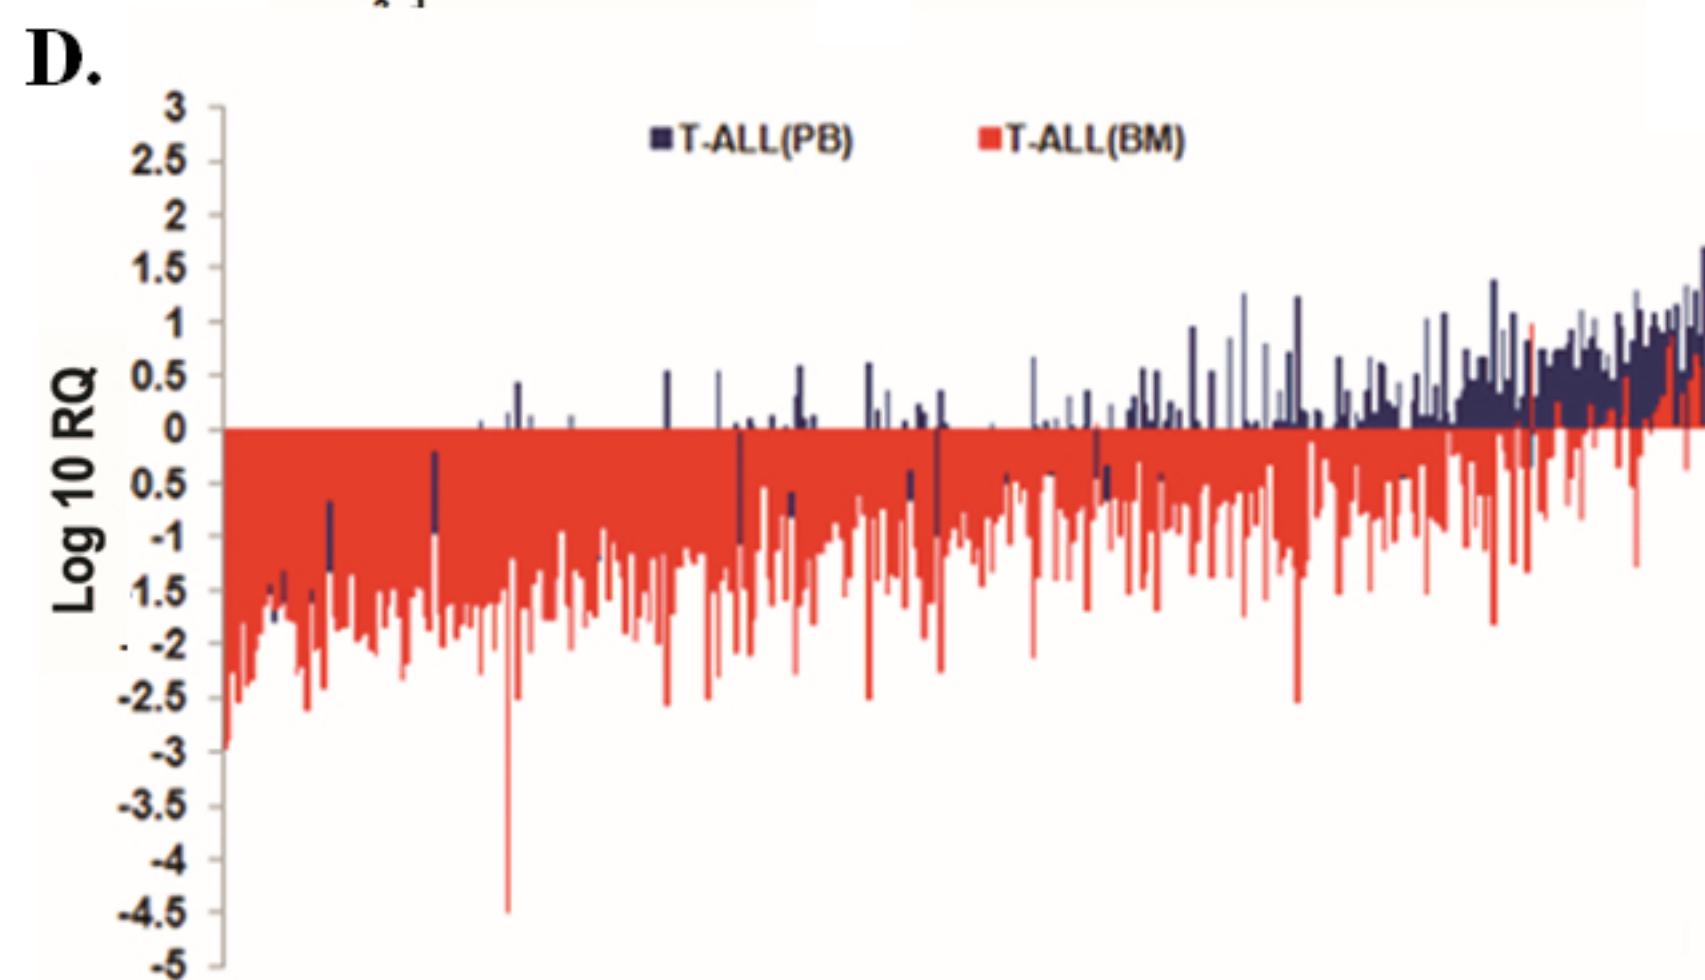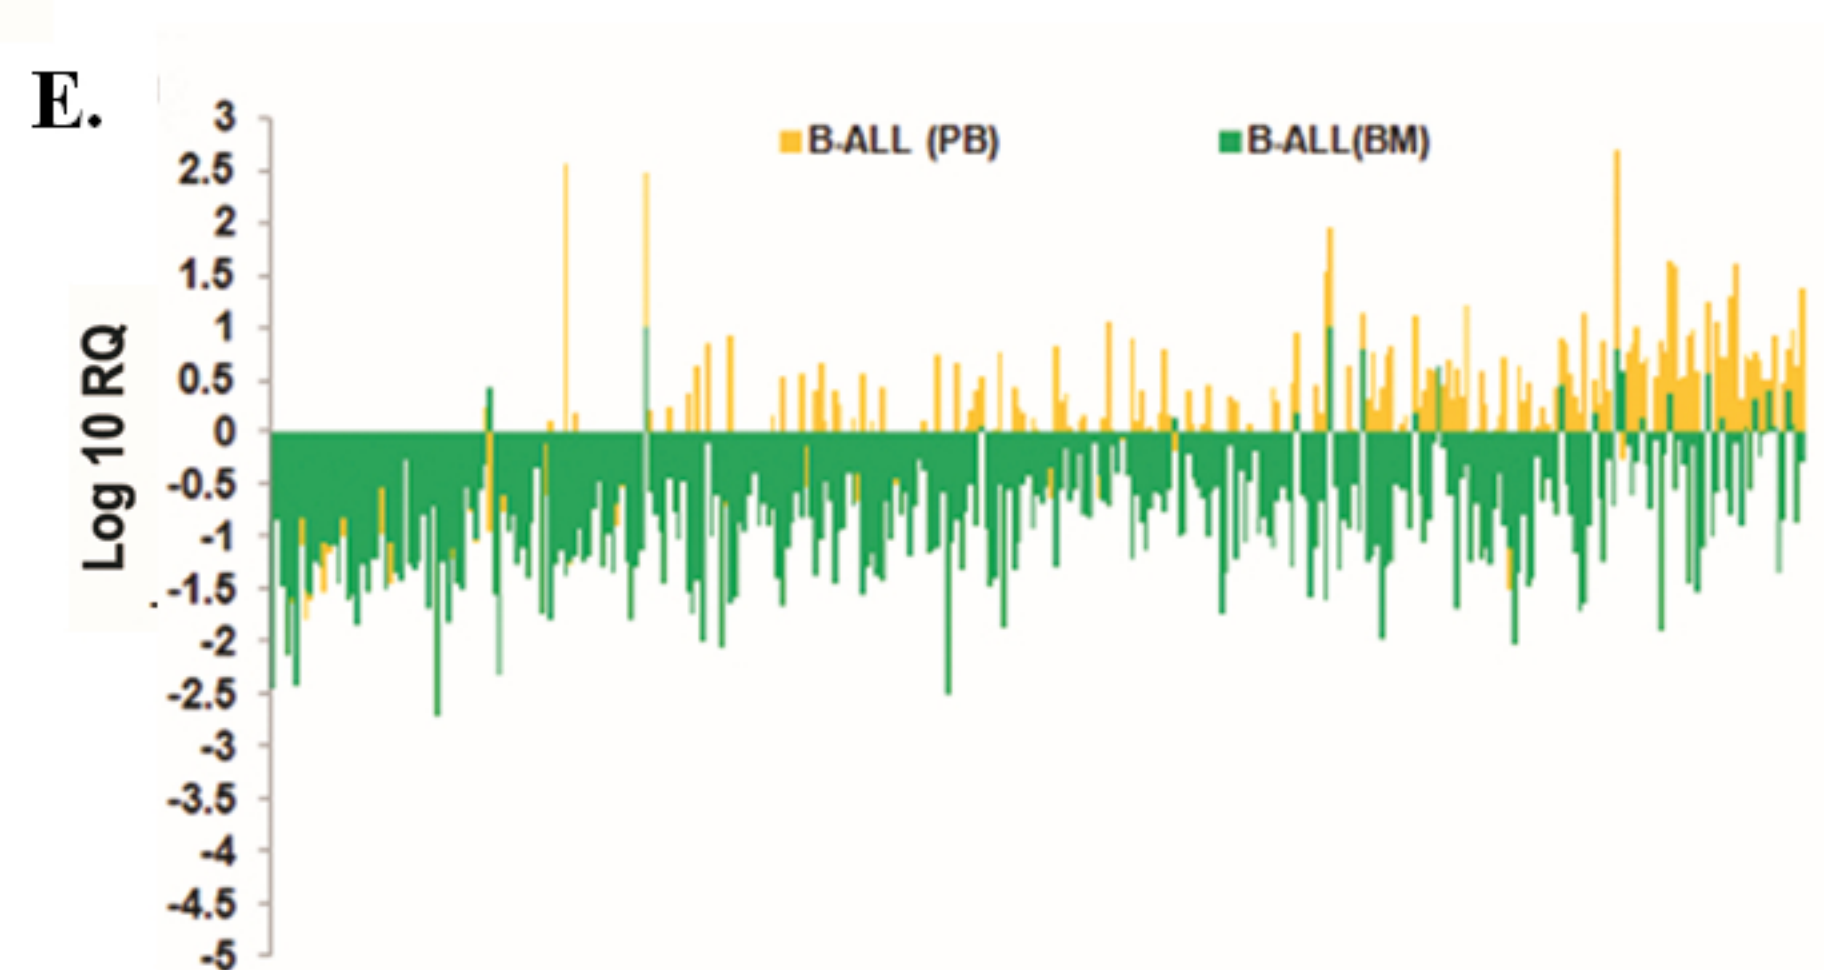

**Supplementary Figure 5: microRNA expression trend of T-ALL vs B-ALL (A) between TALL and B-ALL (B) between Peripheral Blood (PB) of T-ALL and B-ALL and (C) bone marrow (BM) of T-ALL and B-ALL (D & E) endogenous differences between PB and BM of TALL and B-ALL respectively.**





**Figure S8.**

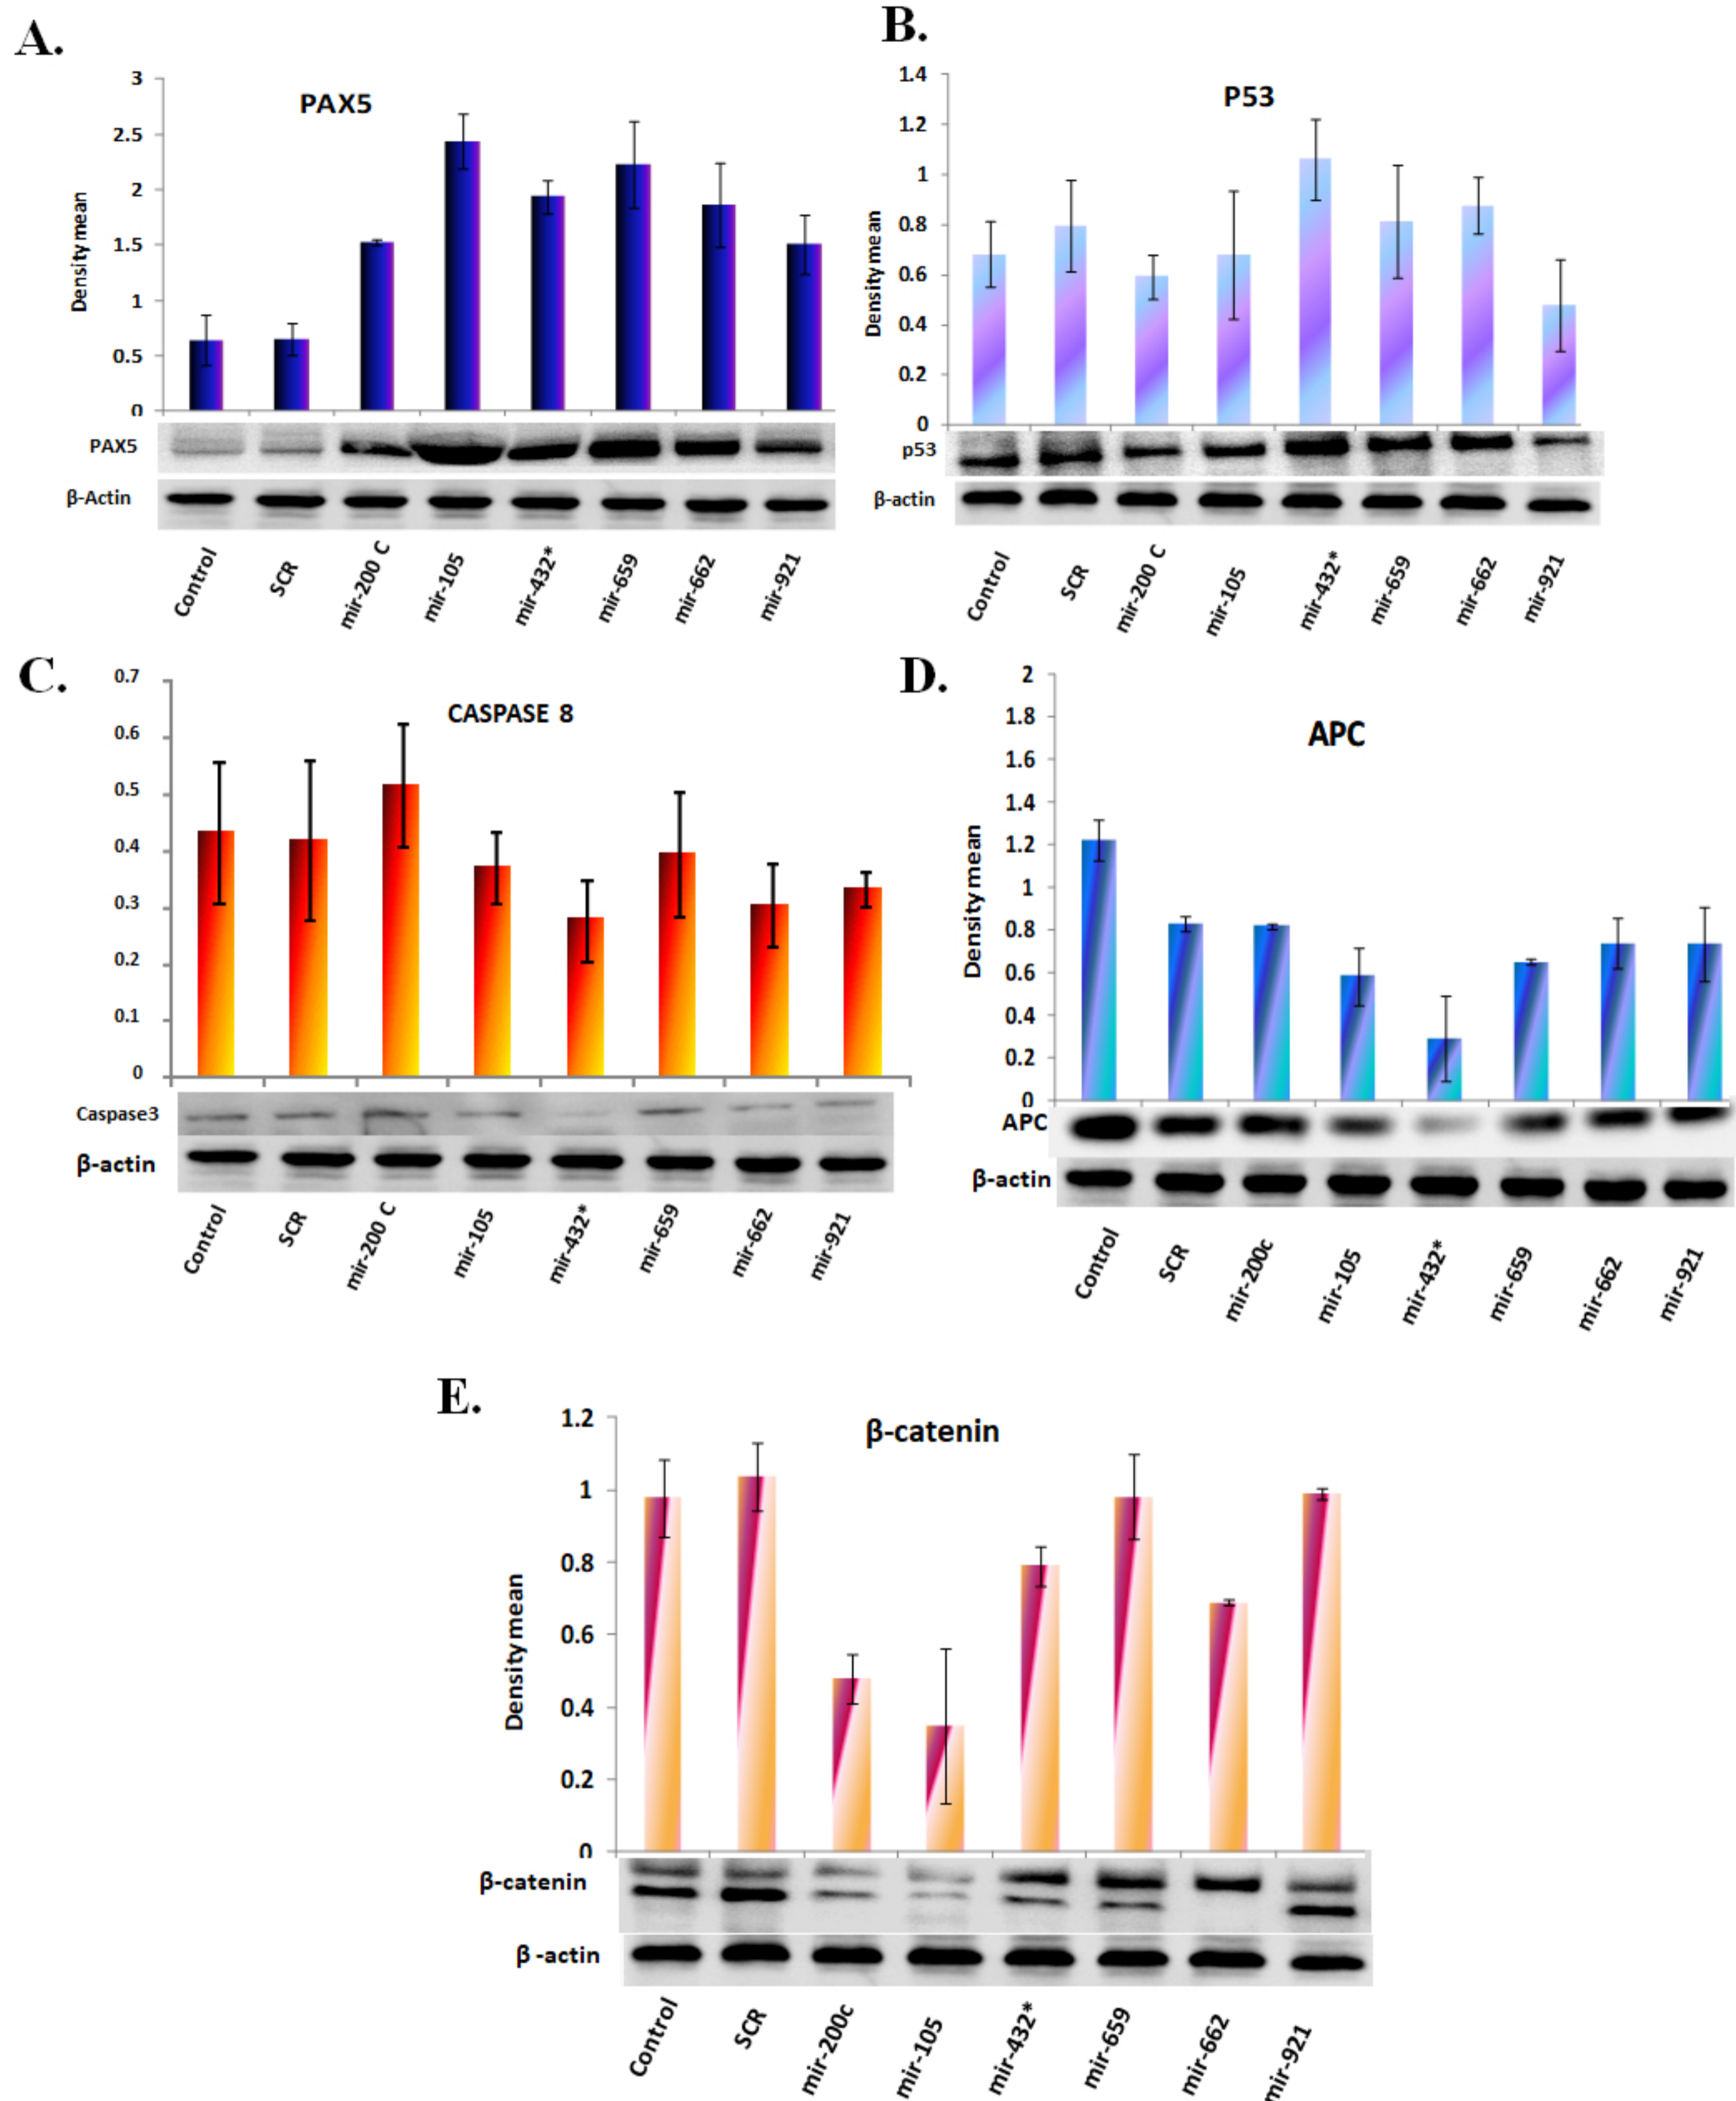

**Supplementary Figure 8: Densitometric analysis.** microRNAs probes transfected in Jurkat cell lines showing the respective target shutdown (A) PAX5, (B) P53, (C) caspase8, (D) APC, (E)  $\beta$ -catenin.



**Figure S9.**

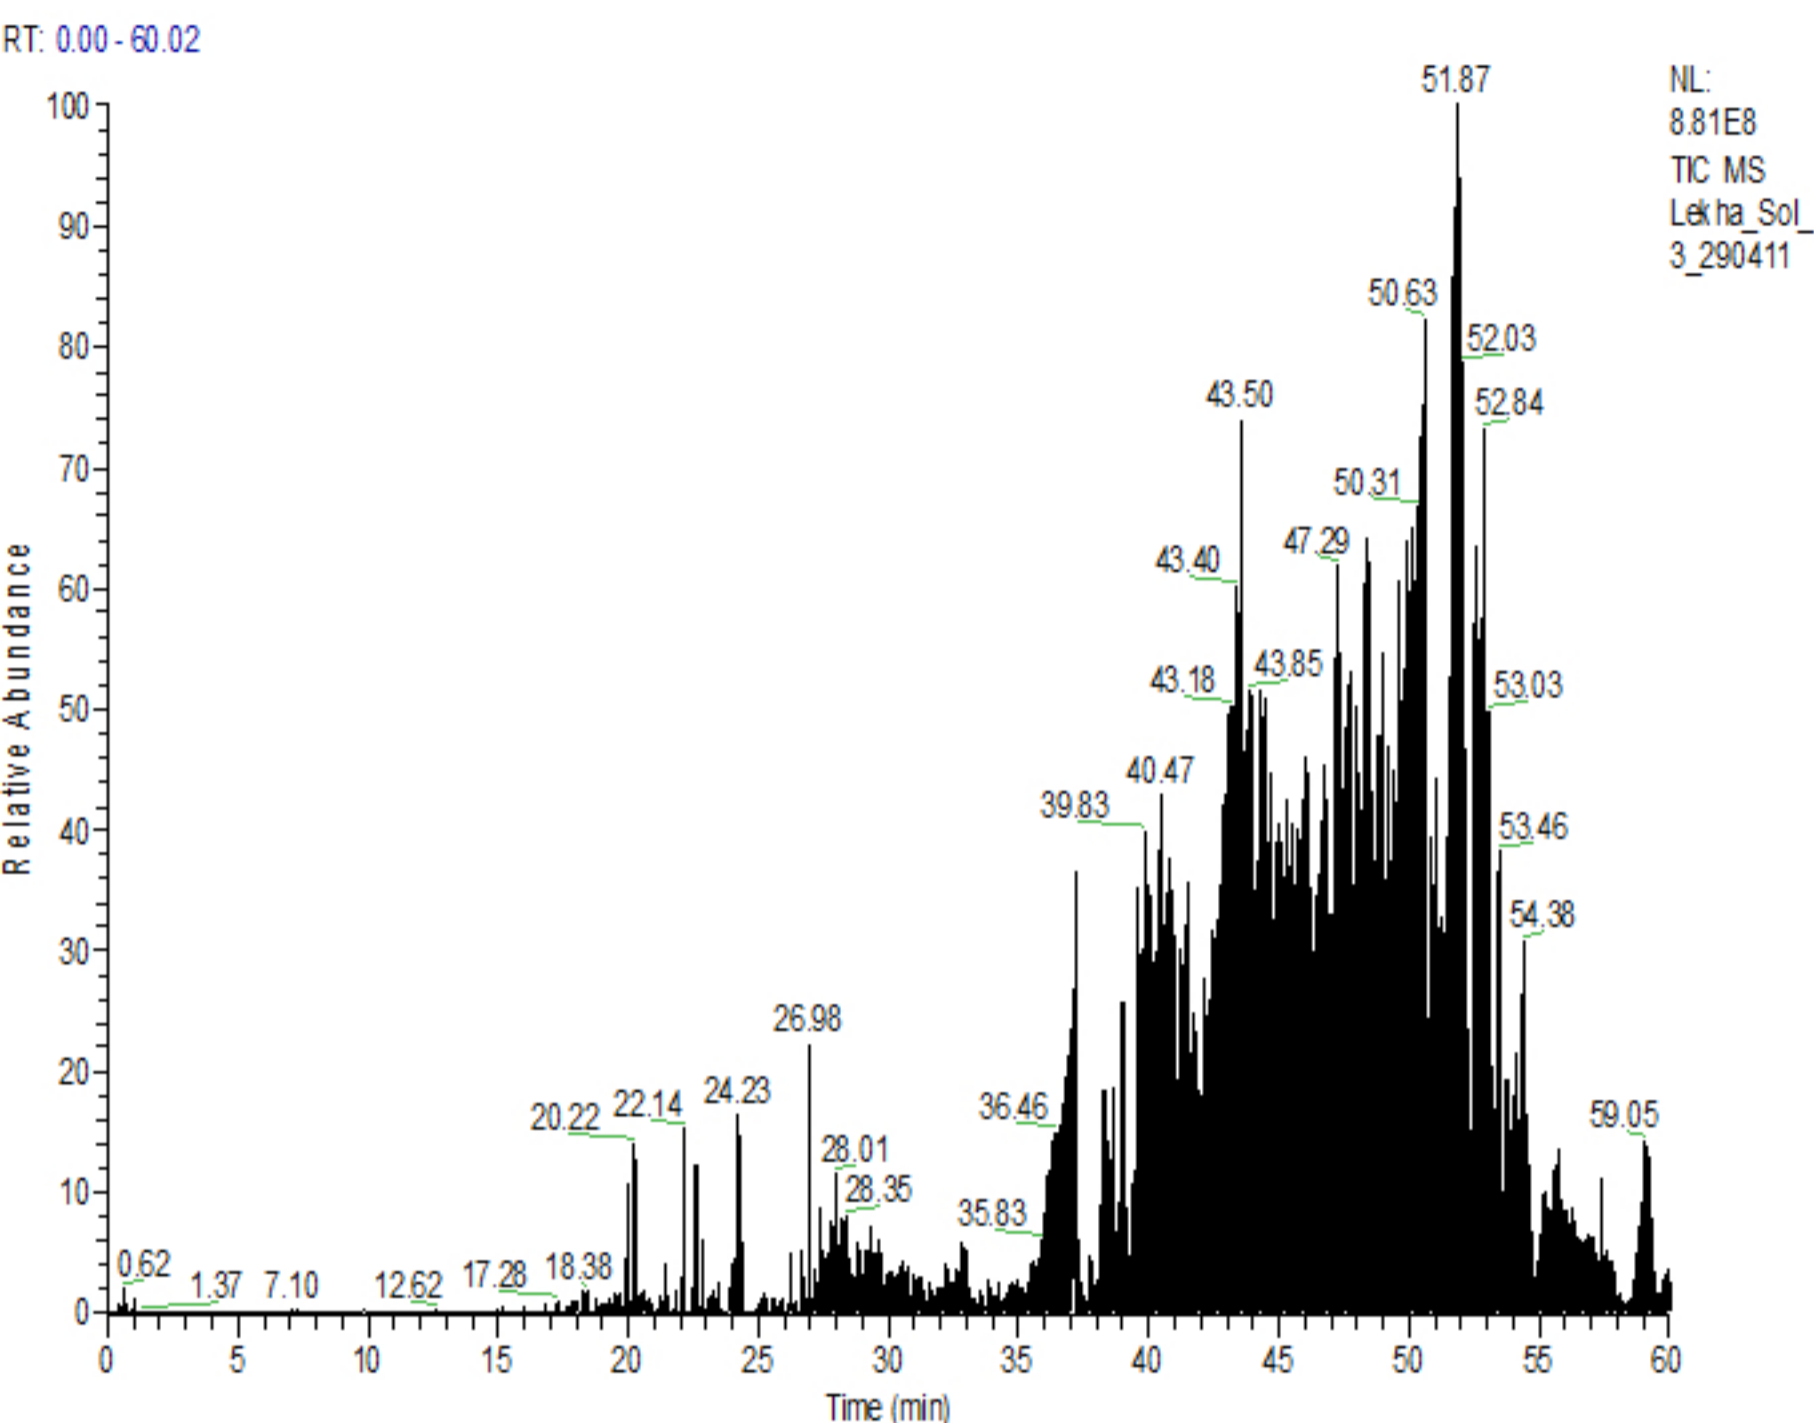

**Normal**

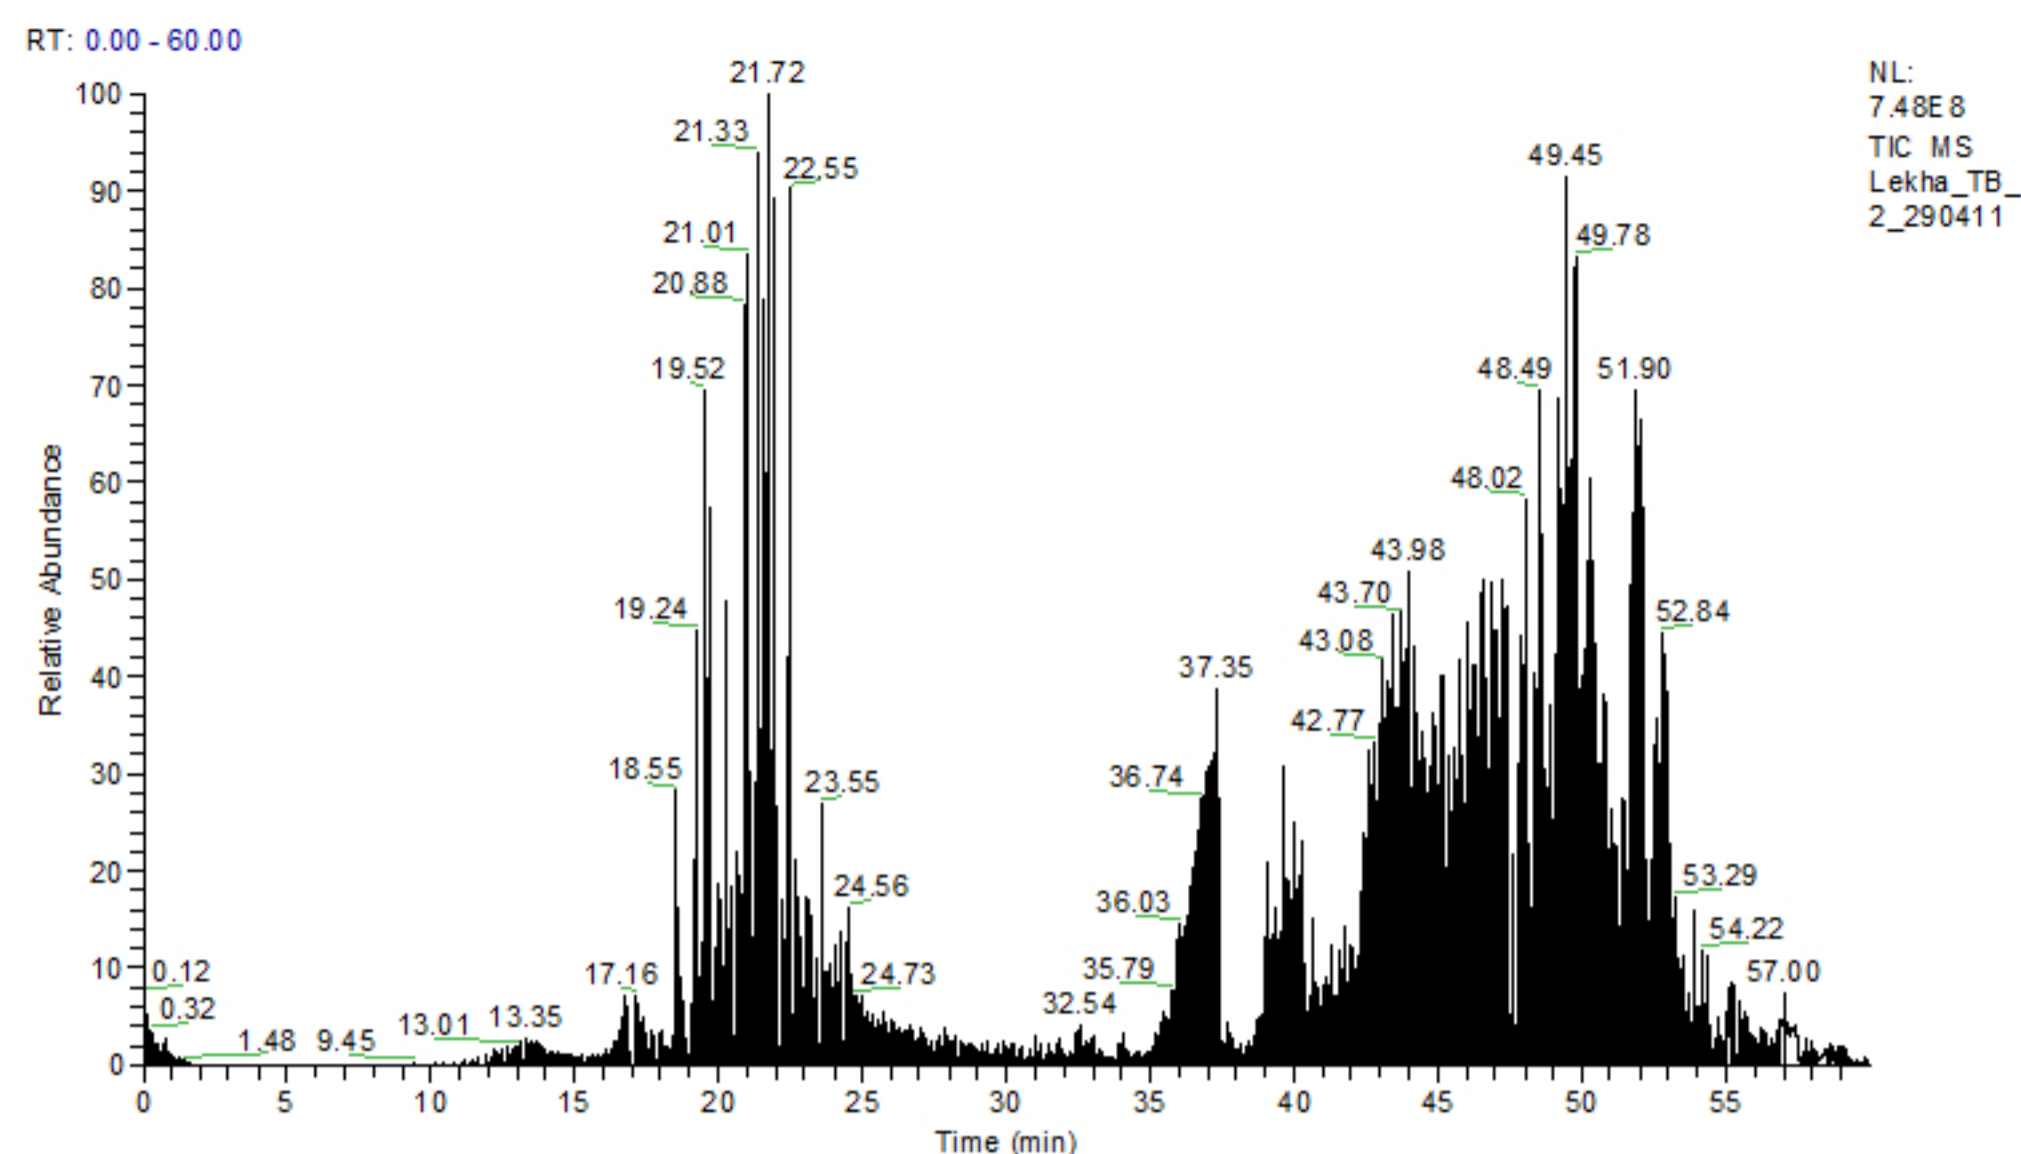

**T-ALL PB**

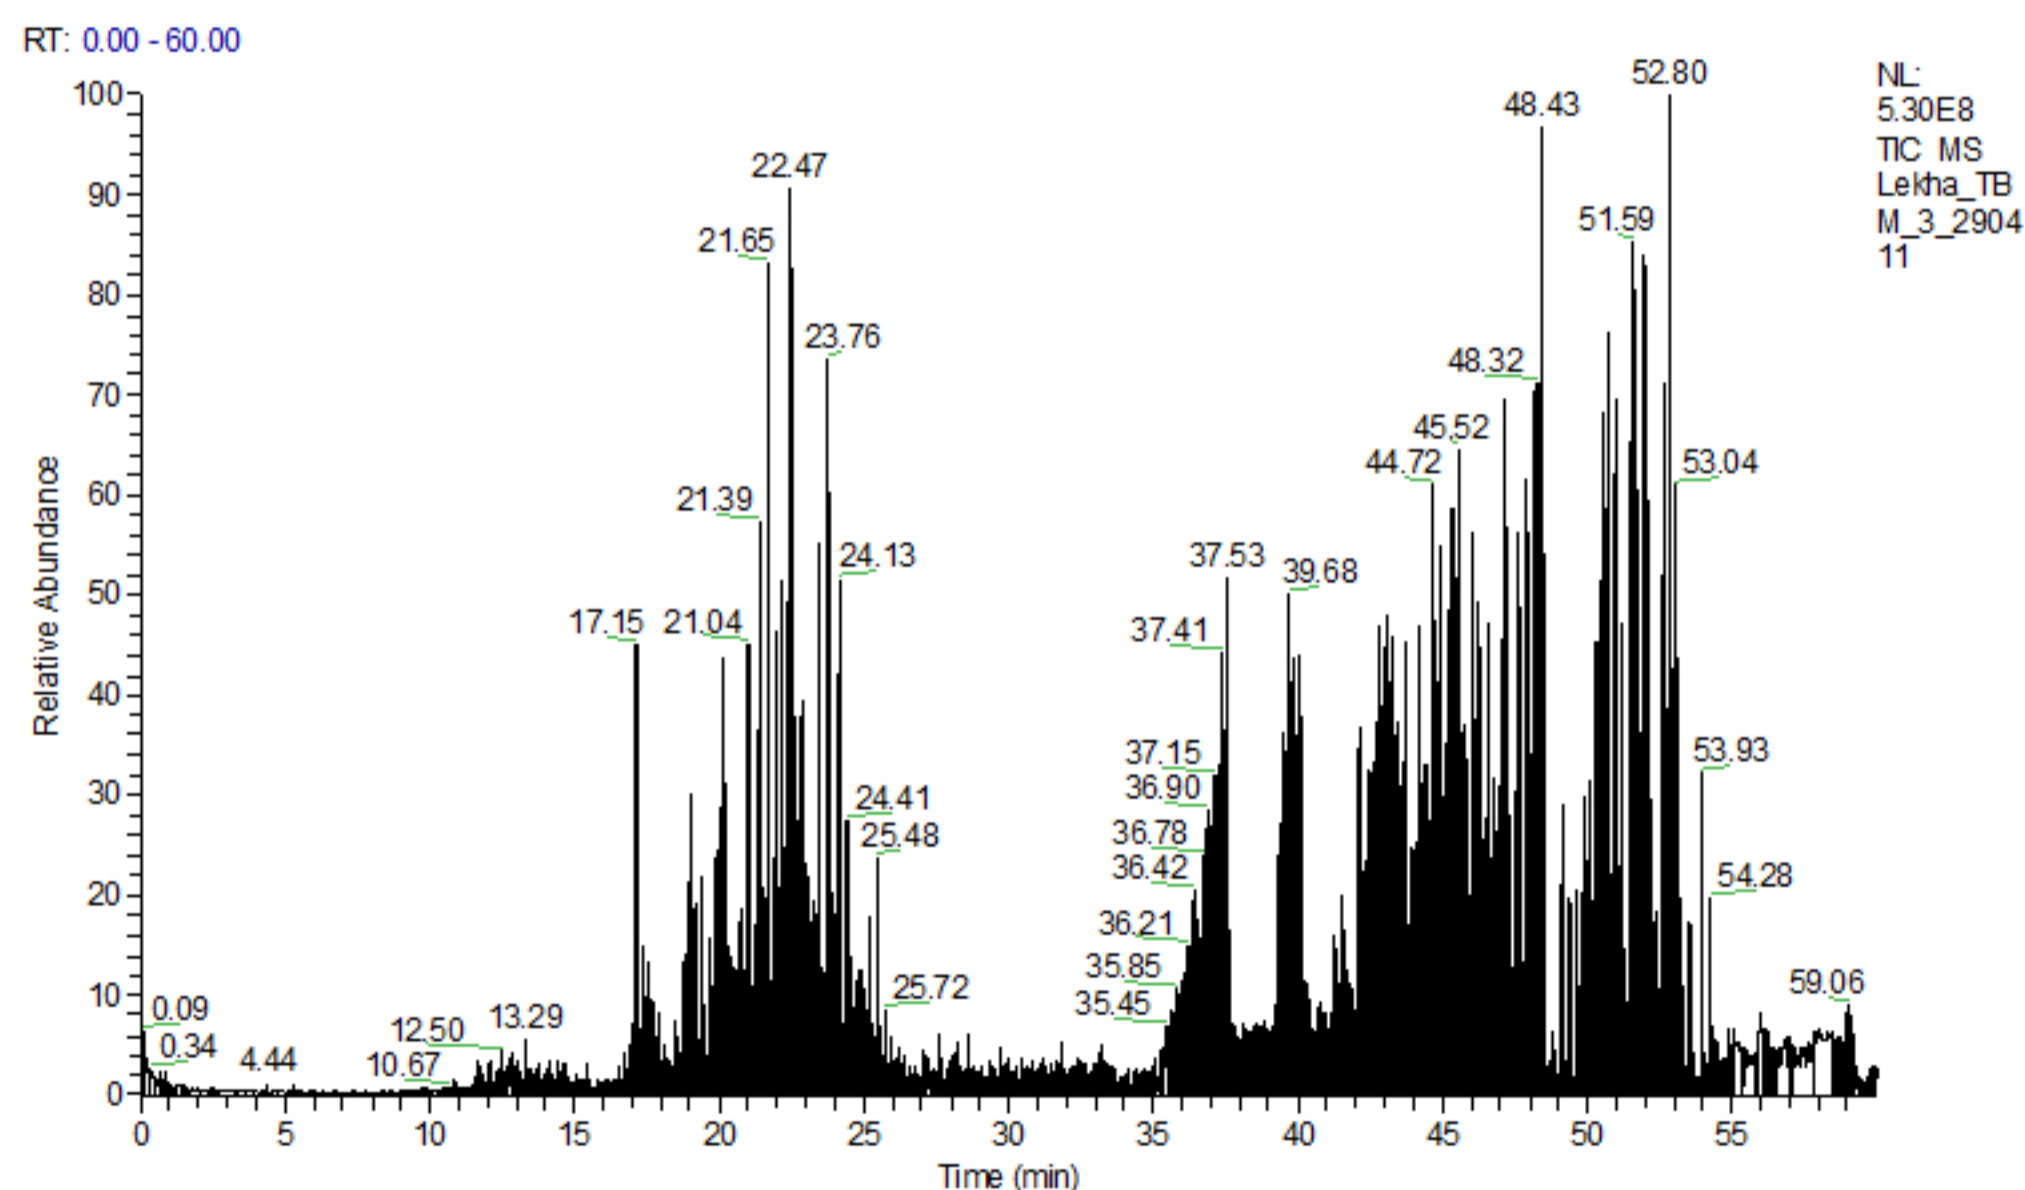

**T-ALL BM**

**Supplementary Figure 9: Total ion current (TIC) chromatogram profile of the LC-MS/MS analysis performed using ALL samples. T-ALL samples showed endogenous differences in their peak patterns as compared to the normal samples.**

A.

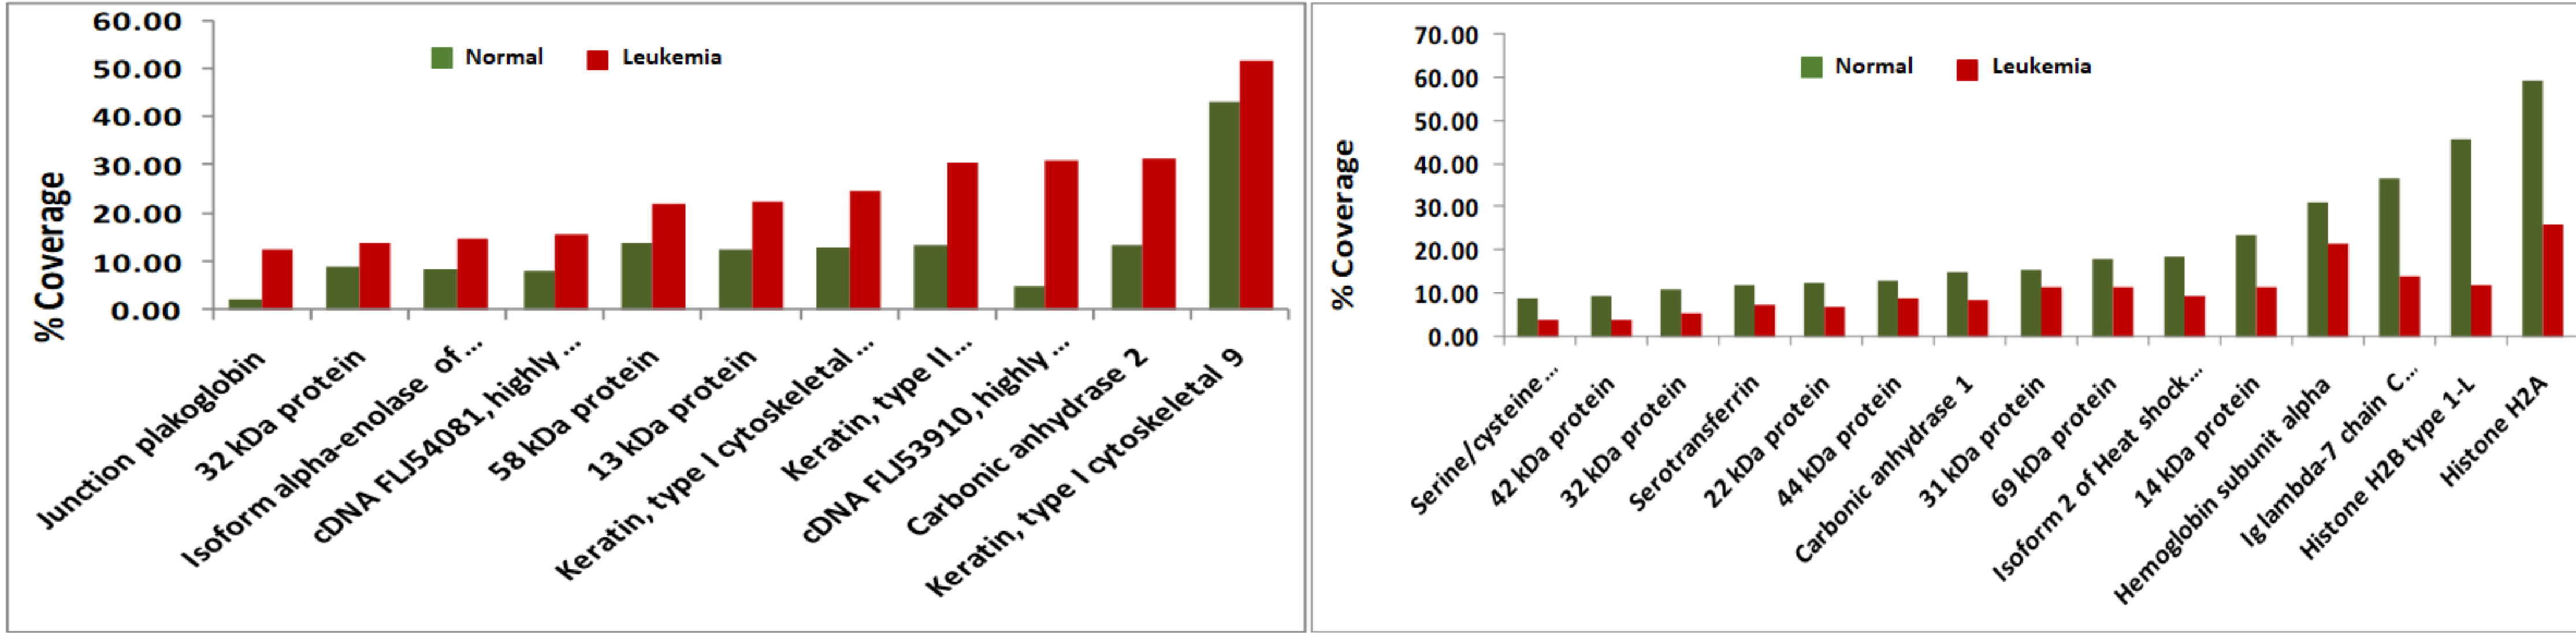

B.

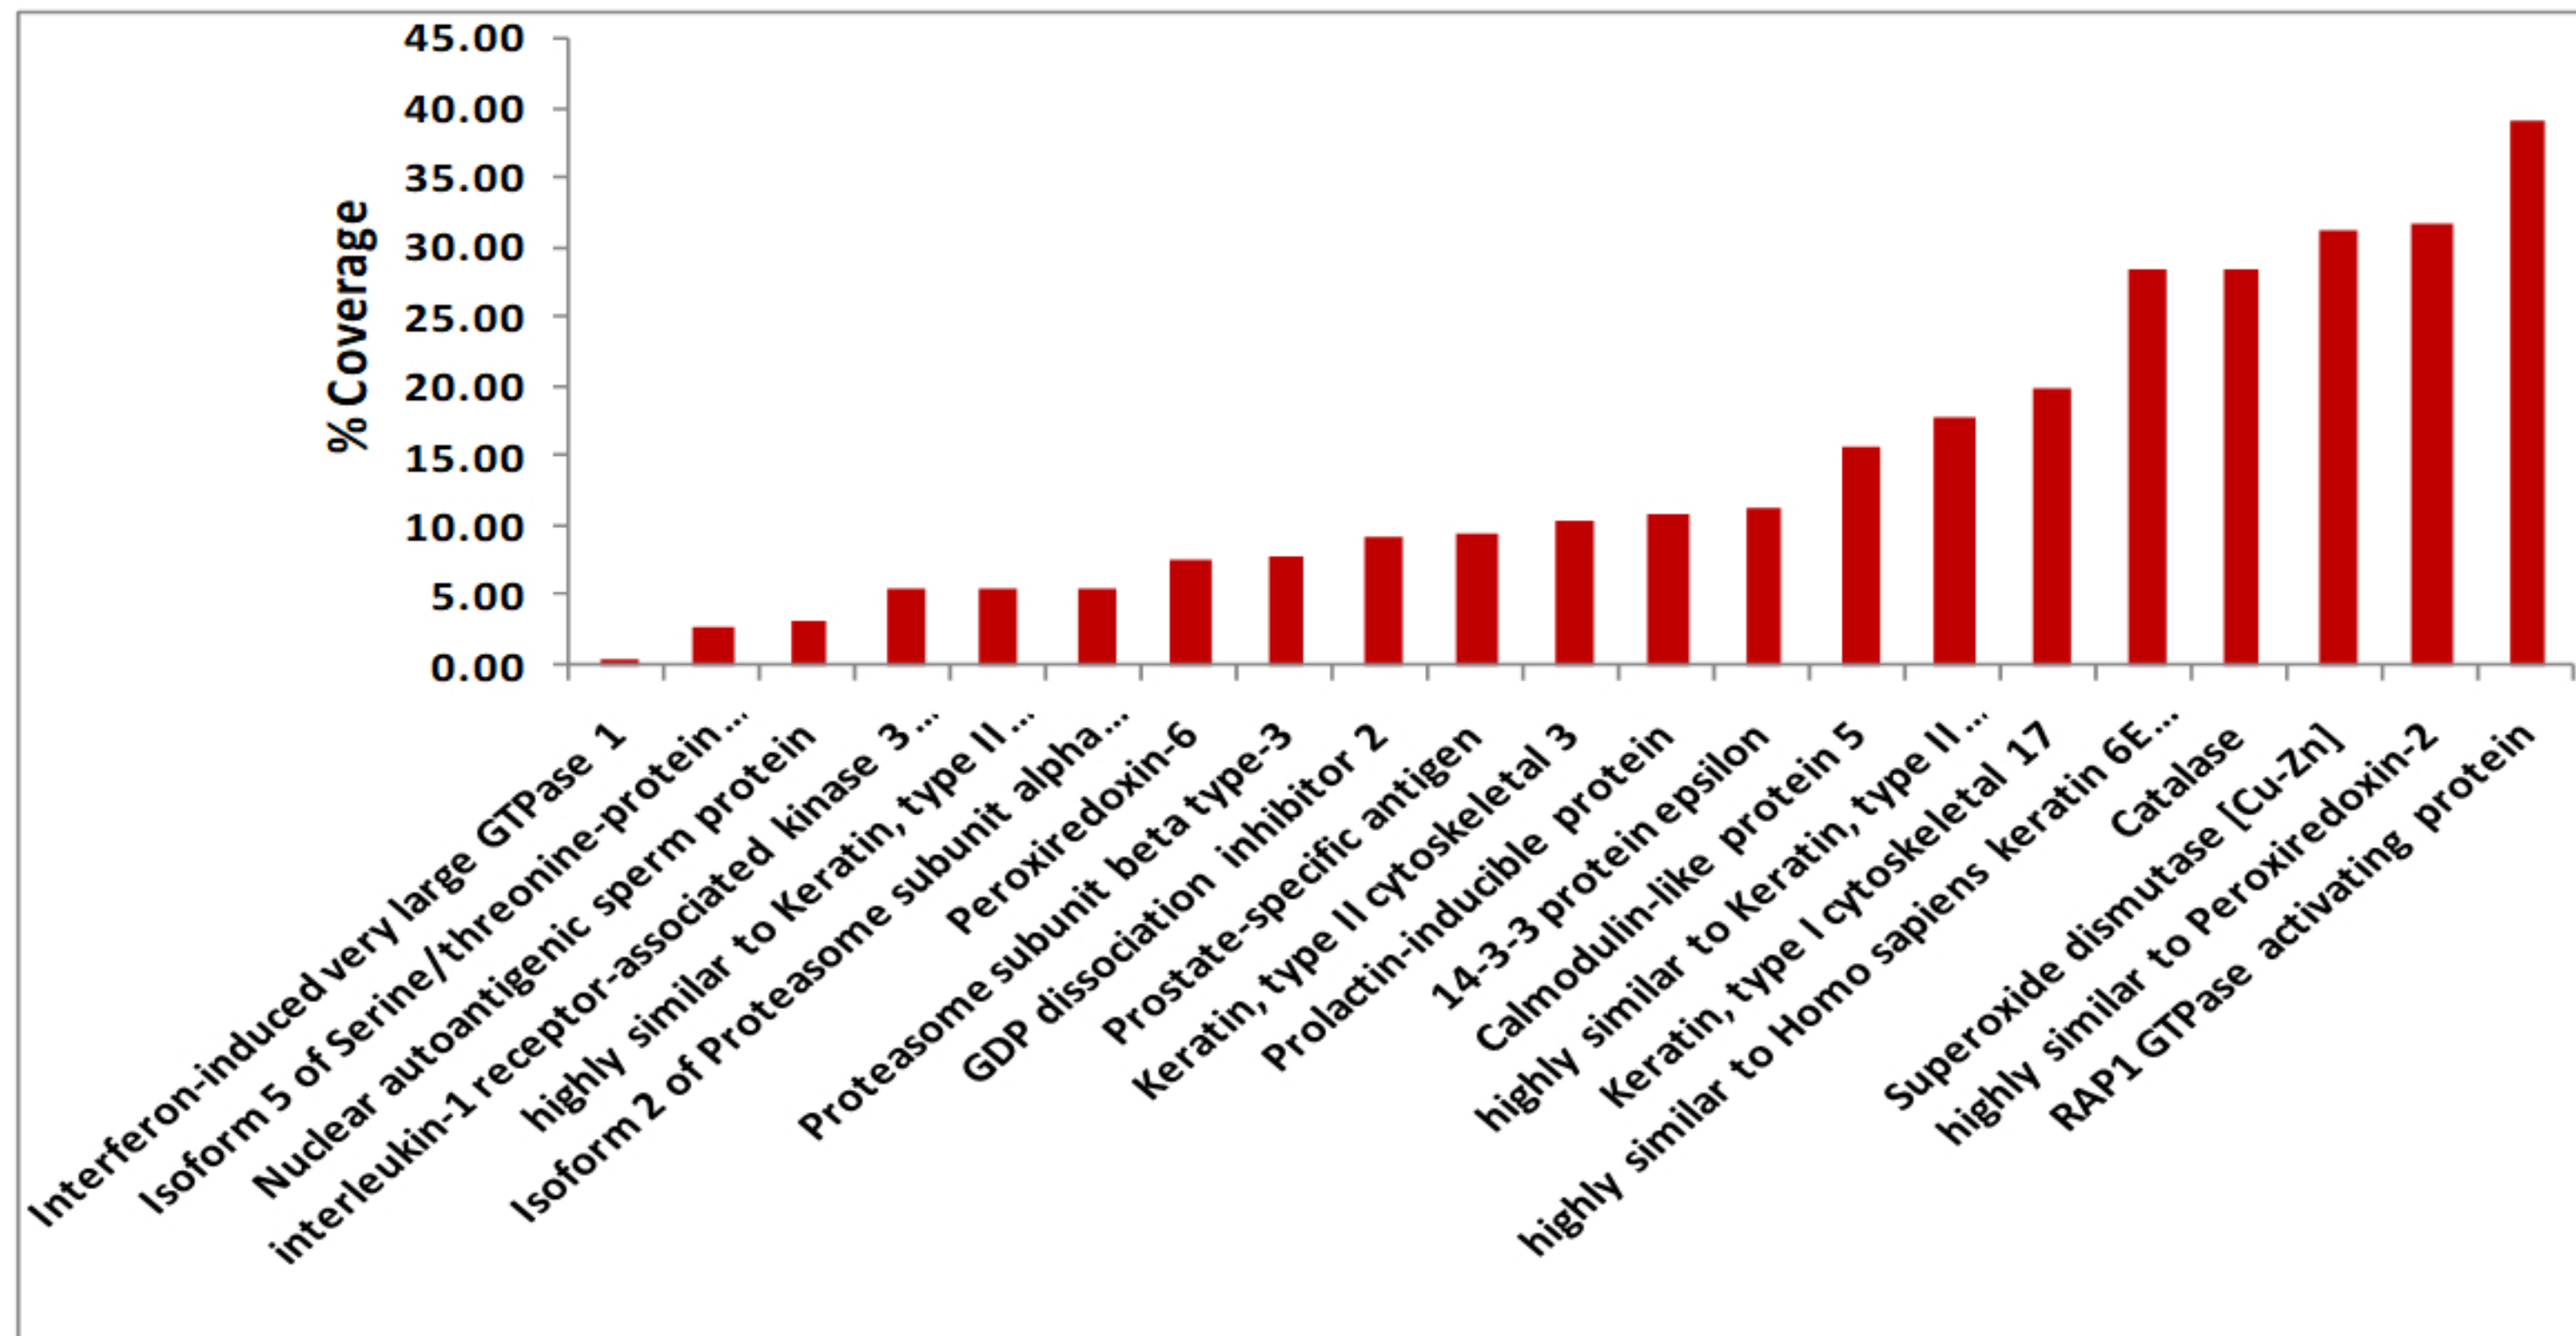

**Supplementary Figure 10: Protein profiling in ALL samples.** (A) Protein expression profile of leukemic and normal samples reveals differential expression of proteins. (B) Proteins expressed only in Leukemia samples.

A.

| Accession         | Description                                         | Accession         | Description                                      |
|-------------------|-----------------------------------------------------|-------------------|--------------------------------------------------|
| O08664            | B-cell CLL/lymphoma 7 protein family member C       | IPI:PII00020039.5 | Cylicin-1                                        |
| Q5ZM39            | B-cell lymphoma 6 protein homolog OS=Gallus ga      | Q05421            | Cytochrome P450 2E1 OS=Mus musculus GN=Cyp       |
| O95999            | B-cell lymphoma/leukemia 10 OS=Homo sapiens         | P08516            | Cytochrome P450 4A10 OS=Rattus norvegicus GI     |
| Q5TBC7            | Bcl-2-like protein 15 OS=Homo sapiens GN=BCL2L      | O46054            | Cytochrome P450 4ae1 OS=Drosophila melano        |
| Q568D5            | BRCA1-A complex subunit BRE OS=Danio rerio GN       | Q2H0G2            | Dicer-like protein 1 OS=Chaetomium globosum G    |
| P38398            | Breast cancer type 1 susceptibility protein OS=H    | Q2UNK5            | Dicer-like protein 2 OS=Aspergillus oryzae GN=dc |
| IPI:PII00412408.1 | Breast cancer type 2 susceptibility protein         | Q1DW80            | Dicer-like protein 2 OS=Coccidioides immitis GN= |
| Q95JR0            | Cancer-associated gene 1 protein homolog OS=M       | P06101            | Hsp90 co-chaperone Cdc37 OS=Saccharomyces c      |
| IPI:PII00031392.2 | caspase recruitment domain-containing protein 1     | IPI:PII00014069.2 | Protein Wnt-11                                   |
| Q06VK9            | Caspase-like protein OS=Trichoplusia ni ascoviru    | P40589            | Protein Wnt-4 OS=Drosophila melanogaster GN=     |
| Q5F362            | Cell cycle control protein 50A OS=Gallus gallus GN  | O14904            | Protein Wnt-9a OS=Homo sapiens GN=WNT9A PE       |
| Q9XWD6            | Cell death abnormality protein 1 OS=Caenorhabd      | Q8CB96            | Ras association domain-containing protein 4 OS=  |
| O34814            | Cell division ATP-binding protein ftsE OS=Bacillus  | P50904            | Ras GTPase-activating protein 1 OS=Rattus norv   |
| P25342            | Cell division control protein 10 OS=Saccharomyce    | IPI:PII00328905.6 | Ras GTPase-activating-like protein IQGAP3        |
| P92948            | Cell division cycle 5-like protein OS=Arabidopsis t | Q8IS11            | Ras guanine nucleotide exchange factor O OS=Di   |
| P54774            | Cell division cycle protein 48 homolog OS=Glycine   | Q96JH8            | Ras-associating and dilute domain-containing pr  |
| Q1RGP0            | Cell division protease ftsH homolog OS=Rickettsi    | P59190            | Ras-related protein Rab-15 OS=Homo sapiens GN    |
| P47466            | Cell division protein ftsZ OS=Mycoplasma genitali   | P34892            | Receptor-like tyrosine-protein kinase kin-16 OS= |
| Q9NYV4            | Cell division protein kinase 12 OS=Homo sapiens     | Q9XS78            | T-cell surface glycoprotein CD4 OS=Delphinapter  |
| C0RW22            | Cell division protein kinase 14 OS=Dasypus nove     | P07725            | T-cell surface glycoprotein CD8 alpha chain OS=R |
| B1I4Q9            | Cell division topological specificity factor OS=Des | Q01965            | T-lymphocyte surface antigen Ly-9 OS=Mus mus     |
| Q9NX58            | Cell growth-regulating nucleolar protein OS=Hom     | P58681            | Toll-like receptor 7 OS=Mus musculus GN=Tlr7 PE  |
| Q56020            | Cell invasion protein sipC OS=Salmonella typhim u   | P41274            | Tumor necrosis factor ligand superfamily membe   |
| A4VRA1            | Cell volume regulation protein A homolog OS=Pse     | IPI:PII00141614.3 | Tumor protein p53-inducible protein 13           |
| P25009            | Cyclin puc1 OS=Schizosaccharomyces pombe GN=        | O35485            | Vascular endothelial growth factor B OS=Rattus r |
| Q9LM91            | Cyclin-B2-5 OS=Arabidopsis thaliana GN=CYCB2-5      | Q4QQW5            | Cyclin-related protein FAM58A OS=Rattus norveg   |

B.

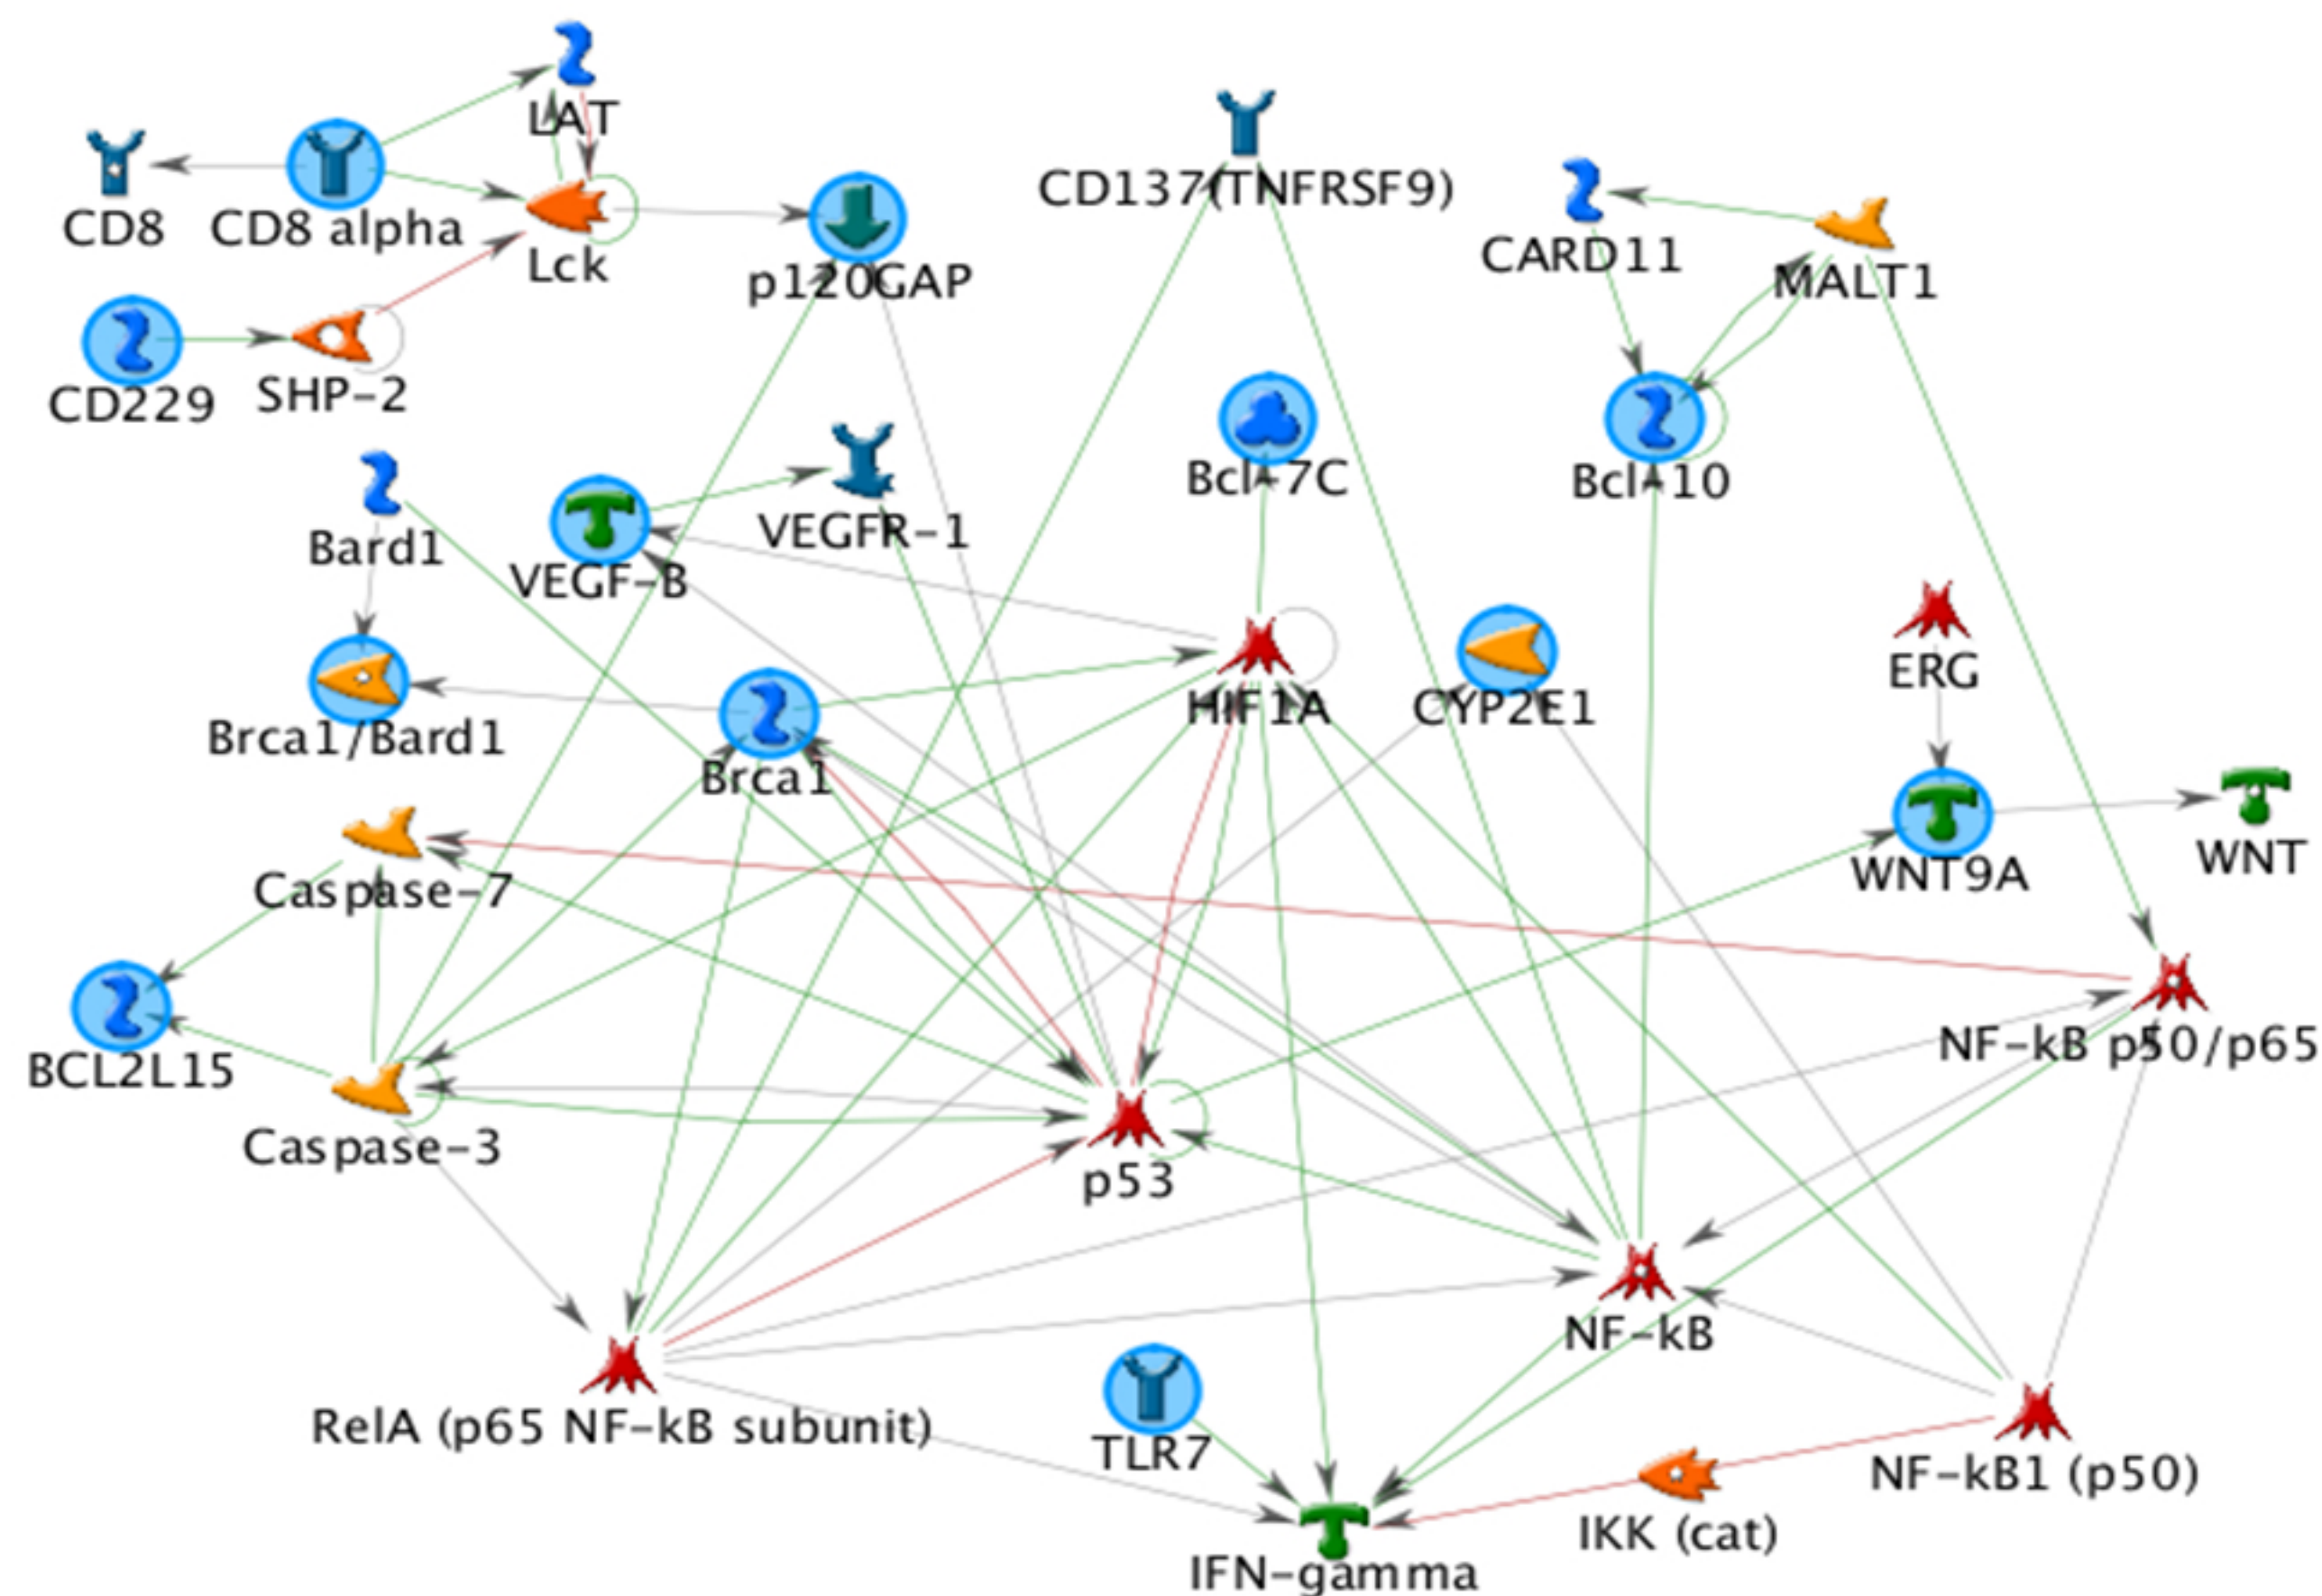

**Supplementary Figure 11: Protein profiling in T-ALL(PB) using LTQ Orbitrap (A) Identified proteins with their accession numbers and (B) GeneGo MetaCore pathway analysis revealing various oncogenic targets.**

**Figure S12.**

**A.**

| Accession         | Description                                                     |
|-------------------|-----------------------------------------------------------------|
| P35329            | B-cell receptor CD22 OS=Mus musculus GN=Cd22 PE=1 SV=1 - [CD    |
| IPI:IPI00642957.1 | Breast cancer anti-estrogen resistance 3, isoform CRA_c         |
| IPI:IPI00550986.4 | Cell cycle regulator Mat89Bb homolog                            |
| Q10059            | Cell division control protein 12 OS=Schizosaccharomyces pombe C |
| IPI:IPI00014575.1 | Cell division control protein 6 homolog                         |
| Q12588            | Cytochrome P450 52A10 OS=Candida maltosa GN=CYP52A10 PE=        |
| IPI:IPI00871799.2 | G2/mitotic-specific cyclin F variant (Fragment)                 |
| IPI:IPI00006903.1 | G-protein coupled receptor 84                                   |
| IPI:IPI00008832.2 | Growth arrest-specific protein 1                                |
| IPI:IPI00844453.1 | KI67 Antigen (Fragment)                                         |
| Q756C3            | Pre-mRNA-splicing factor CEF1 OS=Ashbya gossypii GN=CEF1 PE=    |
| IPI:IPI00163084.3 | Pre-mRNA-splicing factor SYF1                                   |
| IPI:IPI00011400.2 | T-lymphoma invasion and metastasis-inducing protein 1           |
| IPI:IPI00019006.2 | Toll-like receptor 2                                            |
| IPI:IPI00029263.2 | Tyrosine-protein kinase Fer                                     |
| B3MH43            | Tyrosine-protein kinase-like otk OS=Drosophila ananassae GN=ot  |

**B.**

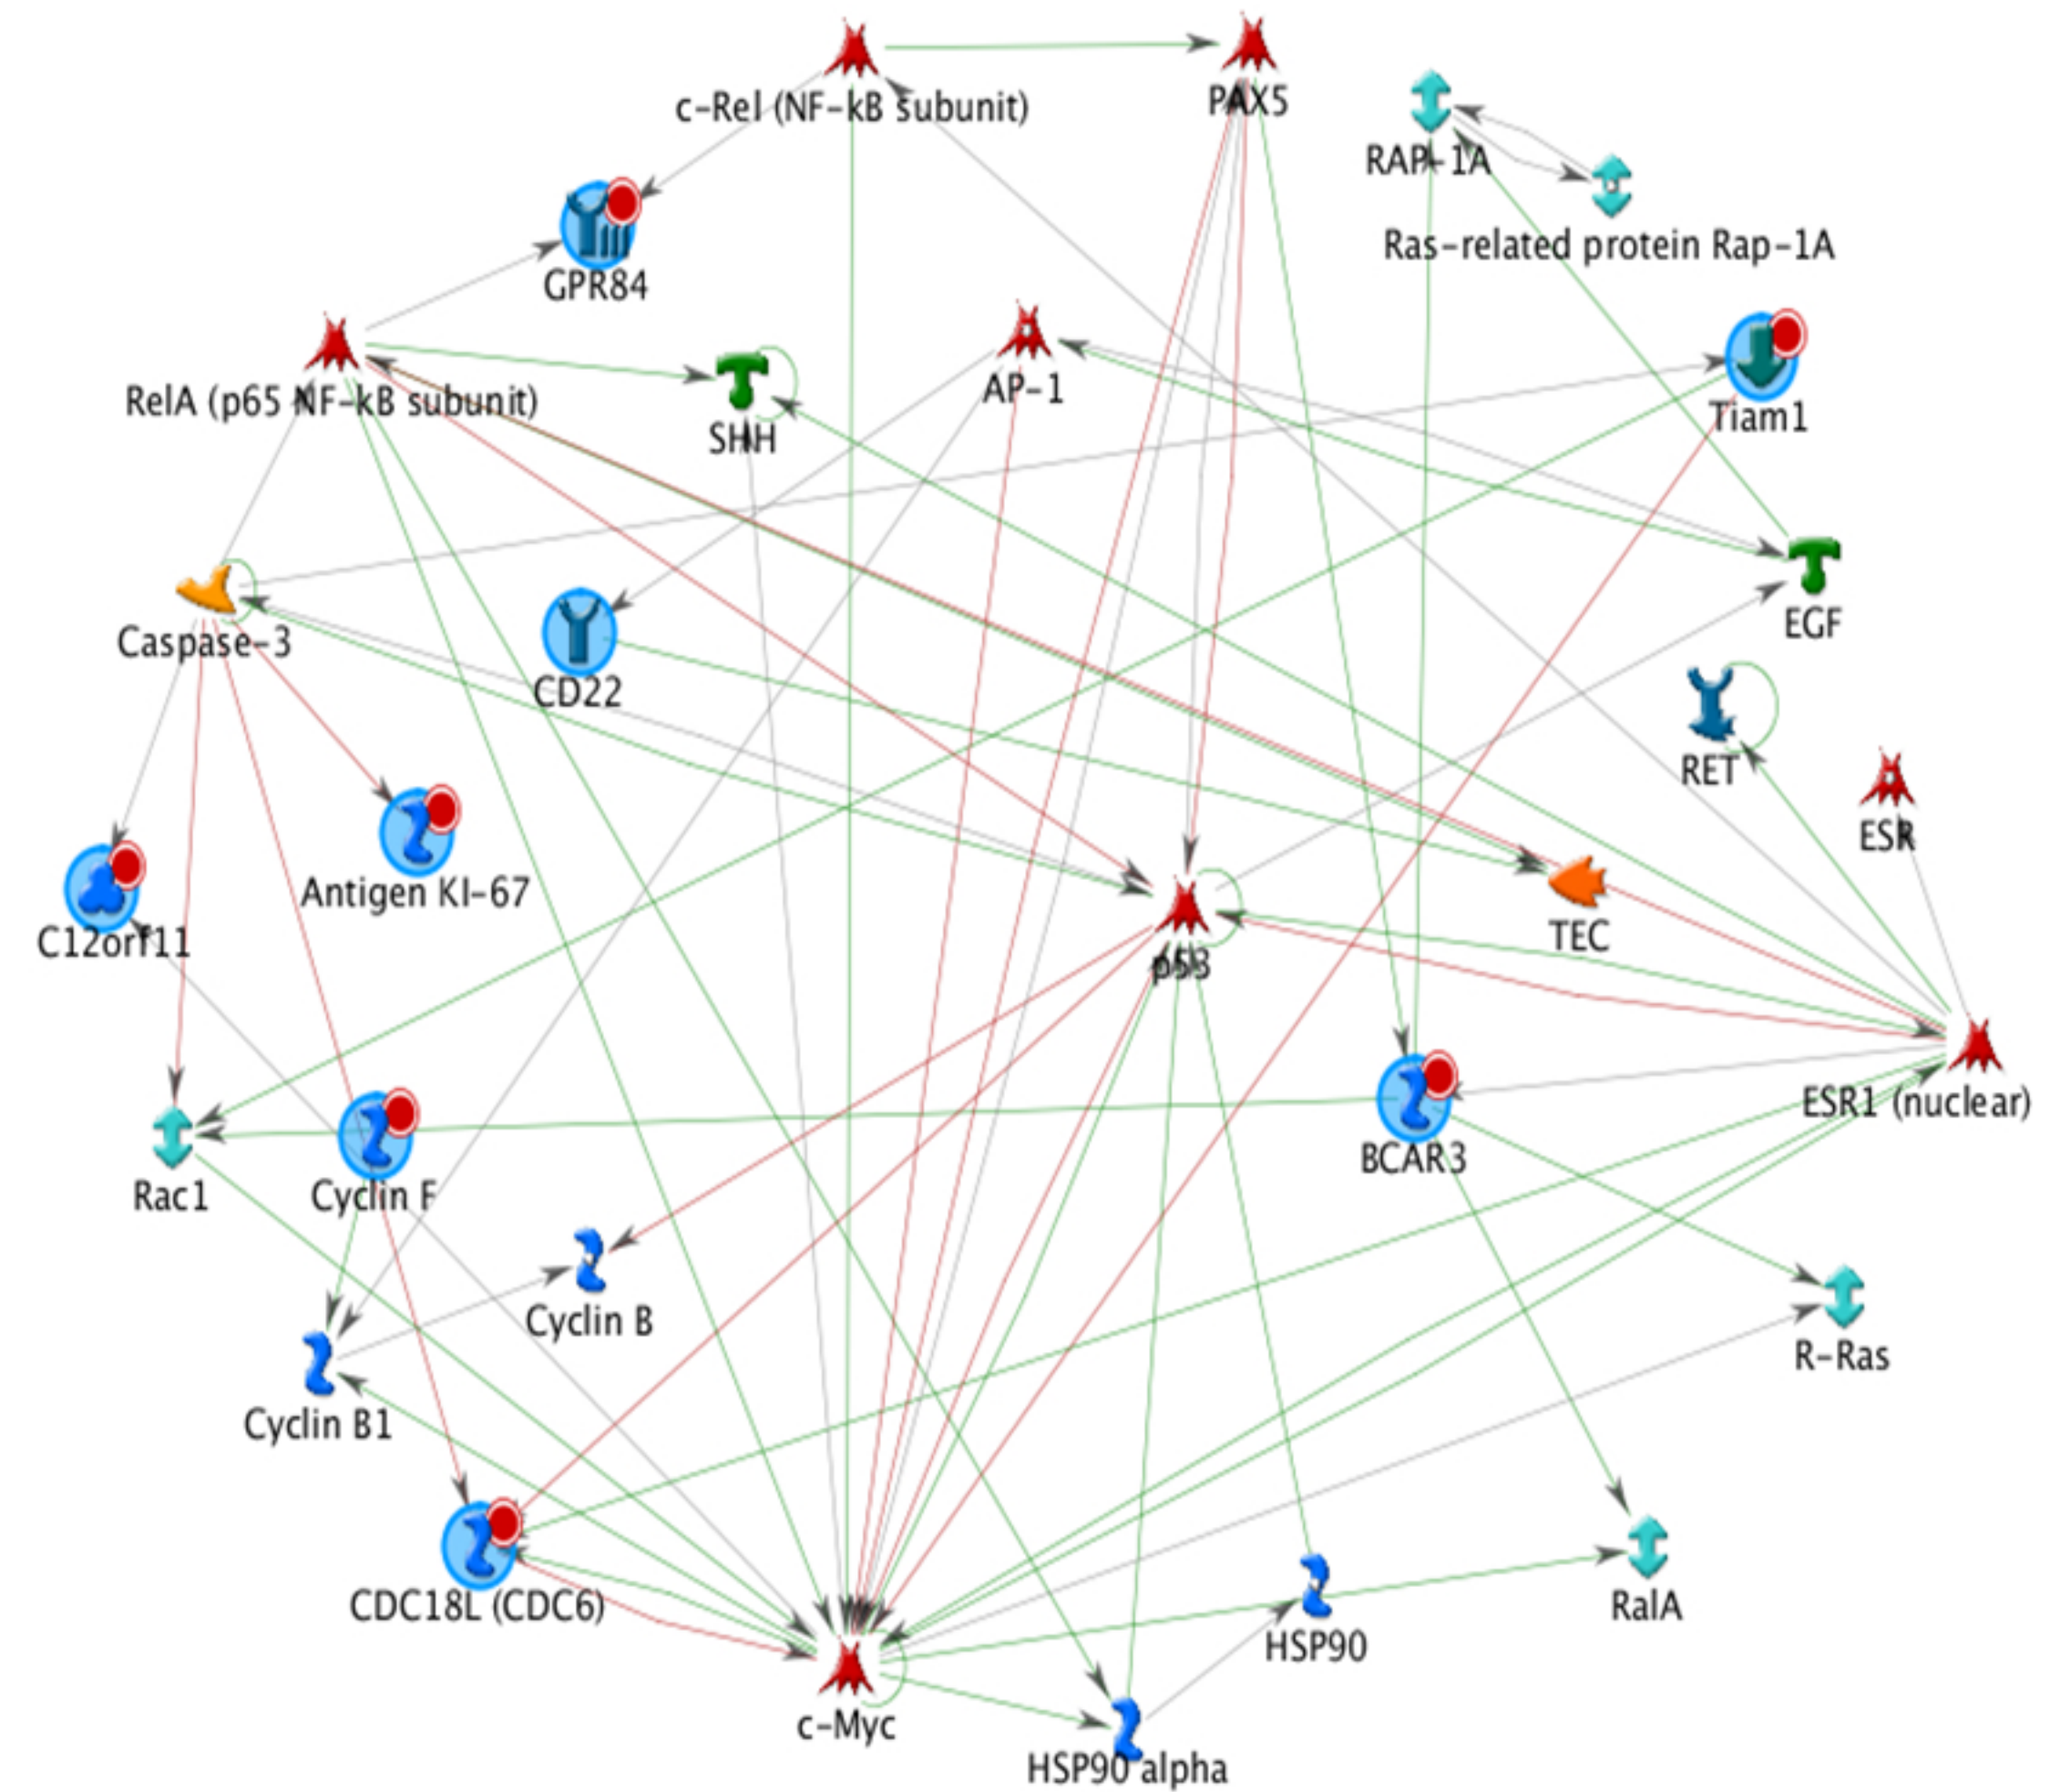

**Supplementary Figure 12:** Protein profiling in T-ALL (BM) using LTQ Orbitrap (A) Identified proteins with their accession numbers and (B) GeneGo MetaCore pathway analysis revealing various oncogenic targets.
